# Supplementary material for: Clinical and genetic associations of deep learning-derived cardiac magnetic resonance-based left ventricular mass
Source: PubMed Central journal article supplement (PMC10030590; doi:10.1038/s41467-023-37173-w), 2023-03-21
Supplement: 41467_2023_37173_MOESM1_ESM.pdf [file 41467_2023_37173_MOESM1_ESM.pdf]

# Clinical and Genetic Associations of Deep Learning-Derived Cardiac Magnetic Resonance-Based Left Ventricular Mass

## Supplementary Information

### Index

|                                                                                                                                                                                       |    |
|---------------------------------------------------------------------------------------------------------------------------------------------------------------------------------------|----|
| <b>Supplementary Table 1.</b> Baseline characteristics of study samples .....                                                                                                         | 1  |
| <b>Supplementary Table 2.</b> Bioinformatics and <i>in silico</i> functional analysis summary .....                                                                                   | 2  |
| <b>Supplementary Table 3.</b> Variants with suggestive associations with CMR-derived left ventricular mass index in the mixed-ancestry GWAS .....                                     | 4  |
| <b>Supplementary Table 4.</b> Variants associated with unindexed CMR-derived left ventricular mass .....                                                                              | 5  |
| <b>Supplementary Table 5.</b> Variants associated with CMR-derived left ventricular mass index in the European-ancestry GWAS .....                                                    | 6  |
| <b>Supplementary Table 6.</b> Variants associated with CMR-derived left ventricular mass indexed using the 2.7 <sup>th</sup> power of height .....                                    | 7  |
| <b>Supplementary Table 7.</b> Variants associated with CMR-derived left ventricular mass after rank-based inverse normal transformation .....                                         | 8  |
| <b>Supplementary Table 8.</b> Variants associated with CMR-derived left ventricular mass indexed using lean body mass .....                                                           | 9  |
| <b>Supplementary Table 9.</b> Variants associated with CMR-derived left ventricular mass index excluding individuals with heart failure and coronary artery disease.....              | 10 |
| <b>Supplementary Table 10.</b> Variants associated with unindexed CMR-derived left ventricular mass conditioned on height and weight .....                                            | 11 |
| <b>Supplementary Table 11.</b> Associations with CMR-derived left ventricular mass across varying indexing methods.....                                                               | 12 |
| <b>Supplementary Table 12.</b> Prior associations of lead variants with CMR-derived left ventricular measurements and cardiovascular traits.....                                      | 13 |
| <b>Supplementary Table 13.</b> Associations between cardiac magnetic resonance-derived indexed LVM and incident cardiovascular disease .....                                          | 16 |
| <b>Supplementary Table 14.</b> Associations between LVMI PRS and incident disease in European ancestry subset.....                                                                    | 17 |
| <b>Supplementary Table 15.</b> Associations between LVMI PRS and incident disease using PRS derived among individuals without prevalent myocardial infarction and heart failure ..... | 18 |
| <b>Supplementary Table 16.</b> Two-sample Mendelian randomization for LVMI and LVM .                                                                                                  | 19 |
| <b>Supplementary Table 17.</b> List of HCM and DCM rare variants.....                                                                                                                 | 20 |

|                                                                                                       |    |
|-------------------------------------------------------------------------------------------------------|----|
| <b>Supplementary Figure 1.</b> Quantile-quantile plot of LVMI and LVM GWAS .....                      | 24 |
| <b>Supplementary Figure 2.</b> Regional association plots for LVMI genome-wide significant loci ..... | 25 |
| <b>Supplementary Figure 3.</b> Manhattan plot of unindexed LV mass GWAS .....                         | 31 |
| <b>Supplementary Figure 4.</b> Quantile-quantile plot of LVMI GWAS for European ancestry subset.....  | 32 |
| <b>Supplementary Figure 5.</b> Manhattan plot of LVMI GWAS in European ancestry subset .....          | 33 |
| <b>Supplementary Figure 6.</b> Two-sample Mendelian randomization plots.....                          | 34 |
| <b>Supplementary Figure 7.</b> Distribution of CMR-derived LV mass.....                               | 35 |
| <b>Supplementary References.</b> .....                                                                | 36 |

**Supplementary Table 1. Baseline characteristics of study samples**

|                                           | Mean $\pm$ SD or N (%)            |                              |                              |                            |
|-------------------------------------------|-----------------------------------|------------------------------|------------------------------|----------------------------|
|                                           | UKBB Phenotype Sample (N=44,375)* | UKBB GWAS Sample (N=43,230)* | UKBB PRS Sample (N=443,326)* | MGB PRS Sample (N=29,354)* |
| Age                                       | 64.6 $\pm$ 7.7                    | 55.6 $\pm$ 7.6               | 57.2 $\pm$ 8.1               | 55.4 $\pm$ 16.8            |
| Female                                    | 23,061 (52.0%)                    | 22,392 (51.8%)               | 241,499 (54.5%)              | 16,008 (54.5%)             |
| Race/ethnicity†                           | -                                 |                              |                              |                            |
| White                                     | 42,941 (96.8%)                    | 41,855 (96.8%)               | 416,675 (94.0%)              | 24,803 (84.5%)             |
| Asian or Pacific Islander                 | 598 (1.3%)                        | 577 (1.3%)                   | 10,328 (2.3%)                | 612 (2.1%)                 |
| Black                                     | 289 (0.7%)                        | 273 (0.6%)                   | 7,359 (1.7%)                 | 1,414 (4.8%)               |
| Other                                     | 226 (0.5%)                        | 213 (0.5%)                   | 4,136 (0.9%)                 | 834 (2.8%)                 |
| Mixed                                     | 204 (0.5%)                        | 198 (0.5%)                   | 2,638 (0.6%)                 | 0 (0%)                     |
| Hispanic/Latino                           | -                                 | -                            | -                            | 946 (3.2%)                 |
| Not reported                              | 117 (0.3%)                        | 114 (0.3%)                   | 2,190 (0.5%)                 | 745 (2.5%)                 |
| Hypertension                              | 13,583 (30.6%)                    | 13,225 (30.6%)               | 130,370 (29.4%)              | 15,024 (51.2%)             |
| Diabetes                                  | 1,752 (3.9%)                      | 1,704 (3.9%)                 | 12,073 (2.7%)                | 4,727 (16.1%)              |
| Heart failure                             | 317 (0.7%)                        | 306 (0.7%)                   | 2,736 (0.6%)                 | 3,516 (12.0%)              |
| Myocardial infarction                     | 1,110 (2.5%)                      | 1,087 (2.5%)                 | 11,282 (2.5%)                | 3,445 (11.7%)              |
| CMR-derived LVM index (g/m <sup>2</sup> ) | 47.7 $\pm$ 12.2                   | -                            | -                            | -                          |

\*Baseline characteristics defined at time of MRI for UKBB Phenotype sample, and time of DNA collection for all other samples  
†Self-reported race. MGB demographic data combines race and ethnicity information.

**Supplementary Table 2.** Bioinformatics and *in silico* functional analysis summary

| <i>Mixed-ancestry analysis</i> |     |                 |              |                  |                  |         |         |                   |                                             |                              |                      |                      |
|--------------------------------|-----|-----------------|--------------|------------------|------------------|---------|---------|-------------------|---------------------------------------------|------------------------------|----------------------|----------------------|
| rsID                           | Chr | Position (hg38) | Closest gene | GTEx v8 eQTL LV* | GTEx v8 eQTL AA* | TWAS LV | TWAS AA | Hi-C linked genes | Plausible genes within 500kb                | Prioritized candidate genes† | Distance to lead SNP | LV expression level‡ |
| rs143800963                    | 1   | 11835418        | CLCN6        | -                | NPPA             | -       | -       | -                 | CLCN6, MTHFR, NPPA, NPPB                    | NPPA                         | 10291                | 35.81                |
|                                |     |                 |              |                  |                  |         |         |                   |                                             | NPPB                         | 22046                | 26.77                |
|                                |     |                 |              |                  |                  |         |         |                   |                                             | CLCN6                        | 29322                | 7.28                 |
| rs2255167                      | 2   | 178693555       | TTN          | FKBP7            | FKBP7            | FKBP7   | FKBP7   | -                 | TTN, FKBP7, CCDC141                         | TTN                          | 167566               | 66.76                |
|                                |     |                 |              |                  |                  |         |         |                   |                                             | FKBP7                        | 229891               | 2.675                |
| rs10497529                     | 2   | 178975161       | CCDC141      | -                | -                | -       | -       | -                 | TTN, CCDC141                                | TTN                          | 449172               | 66.76                |
|                                |     |                 |              |                  |                  |         |         |                   |                                             | CCDC141                      | 145404               | 5.30                 |
| -                              | 5   | 133066736       | HSPA4        | -                | -                | -       | -       | AFF4              | HSPA4, ZCCHC10                              | HSPA4                        | 14723                | 25.89                |
| rs9388498                      | 6   | 126552277       | CENPW        | -                | -                | -       | -       | -                 | CENPW                                       | CENPW                        | 212162               | 0.42                 |
| rs34163229                     | 10  | 73647154        | SYNPO2L      | SYNPO2L          | SYNPO2L          | -       | SYNPO2L | USP54             | MYOZ1, PPP3CB, ANXA7, AGAP5, FUT11, SYNPO2L | SYNPO2L                      | 2273                 | 84.32                |
|                                |     |                 |              | -                | MYOZ1            | -       | MYOZ1   |                   |                                             | MYOZ1                        | 15542                | 1.06                 |
|                                |     |                 |              | FUT11            | FUT11            | -       | -       |                   |                                             | ANXA7                        | 272053               | 50.75                |
|                                |     |                 |              | -                | AGAP5            | -       | AGAP5   |                   |                                             | AGAP5                        | 27133                | 1.74                 |
|                                |     |                 |              | -                | DNAJC9           | -       | -       |                   |                                             |                              |                      |                      |
|                                |     |                 |              | -                | DUSP8P5          | -       | -       |                   |                                             |                              |                      |                      |
| rs3729989                      | 11  | 47348490        | MYBPC3       | PSMC3            | PSMC3            | -       | PSMC3   | -                 | MYBPC3, PSMC3                               | MYBPC3                       | 4467                 | 1,351                |
|                                |     |                 |              |                  |                  |         |         |                   |                                             | PSMC3                        | 91830                | 97.09                |
| rs28552516                     | 12  | 121592356       | KDM2B        | -                | MORN3            | -       | -       | ORAI1, MORN3      | ORAI1, KDM2B, MORN3                         | ORAI1                        | 34194                | 4.91                 |
| rs6598541                      | 15  | 98727906        | IGF1R        | IGF1R            | -                | IGF1R   | -       | -                 | IGF1R                                       | IGF1R                        | 79367                | 5.71                 |
| rs56252725                     | 16  | 14995819        | PDXDC1       | PDXDC1           | -                | PDXDC1  | -       | MYH11             | PDXDC1, NOMO1                               | PDXDC1                       | 21228                | 15.96                |
|                                |     |                 |              | PKD1P3           | -                | -       | -       |                   |                                             | NOMO1                        | 162098               | 15.12                |
|                                |     |                 |              | NPIPA3           | -                | -       | -       |                   |                                             |                              |                      |                      |
|                                |     |                 |              | NPIPA5           | NPIPA5           | -       | -       |                   |                                             |                              |                      |                      |
|                                |     |                 |              | RRN3             | -                | -       | -       |                   |                                             |                              |                      |                      |
|                                |     |                 |              | -                | NOMO1            | -       | -       |                   |                                             | MYH11                        | 801210               | 16.25                |
|                                |     |                 |              | NPIPA1           | NPIPA1           | -       | -       |                   |                                             |                              |                      |                      |

|                                                                                                                                                                                                                                                                                                      |    |           |          |            |            |          |      |               |                                                                 |          |        |        |
|------------------------------------------------------------------------------------------------------------------------------------------------------------------------------------------------------------------------------------------------------------------------------------------------------|----|-----------|----------|------------|------------|----------|------|---------------|-----------------------------------------------------------------|----------|--------|--------|
|                                                                                                                                                                                                                                                                                                      |    |           |          | -          | AC139256.1 | -        | -    |               |                                                                 |          |        |        |
|                                                                                                                                                                                                                                                                                                      |    |           |          | -          | -          | SEZ6L2   | -    |               |                                                                 |          |        |        |
| rs6503451                                                                                                                                                                                                                                                                                            | 17 | 45870981  | MAPT     | MAPT       | -          | -        | -    | -             | MAPT, LRRC37A2, DND1P1, MAPK8IP1P2, KANSL1, ARL17A, WNT3, CRHR1 | KANSL1   | 158935 | 3.72   |
|                                                                                                                                                                                                                                                                                                      |    |           |          | LRRC37A4P  | LRRC37A4P  | -        | -    |               |                                                                 | MAPT     | 23546  | 4.75   |
|                                                                                                                                                                                                                                                                                                      |    |           |          | LRRC37A2   | LRRC37A2   | LRRC37A2 | -    |               |                                                                 | LRRC37A2 | 421752 | 0.12   |
|                                                                                                                                                                                                                                                                                                      |    |           |          | DND1P1     | DND1P1     | -        | -    |               |                                                                 |          |        |        |
|                                                                                                                                                                                                                                                                                                      |    |           |          | MAPK8IP1P2 | MAPK8IP1P2 | -        | -    |               |                                                                 |          |        |        |
|                                                                                                                                                                                                                                                                                                      |    |           |          | LINC02210  | LINC02210  | -        | -    |               |                                                                 |          |        |        |
|                                                                                                                                                                                                                                                                                                      |    |           |          | KANSL1     | KANSL1     | -        | -    |               |                                                                 |          |        |        |
|                                                                                                                                                                                                                                                                                                      |    |           |          | ARL17A     | ARL17A     | -        | -    |               |                                                                 |          |        |        |
|                                                                                                                                                                                                                                                                                                      |    |           |          | WNT3       | WNT3       | -        | -    |               |                                                                 |          |        |        |
|                                                                                                                                                                                                                                                                                                      |    |           |          | -          | NSF        | -        | -    |               |                                                                 |          |        |        |
| rs199501                                                                                                                                                                                                                                                                                             | 17 | 46784981  | WNT3     | WNT3       | WNT3       | WNT3     | WNT3 | -             | NSF, WNT3, LRRC37A, LRRC37A2, KANSL1, ARL17A                    | WNT3     | 22475  | 0.41   |
|                                                                                                                                                                                                                                                                                                      |    |           |          | LRRC37A    | LRRC37A    | -        | -    |               |                                                                 | KANSL1   | 755065 | 3.72   |
|                                                                                                                                                                                                                                                                                                      |    |           |          | LRRC37A2   | LRRC37A2   | -        | -    |               |                                                                 | LRRC37A  | 492248 | 0.12   |
|                                                                                                                                                                                                                                                                                                      |    |           |          | ARL17A     | ARL17A     | -        | -    |               |                                                                 | LRRC37A2 | 273736 | 0.12   |
|                                                                                                                                                                                                                                                                                                      |    |           |          | NSF        | NSF        | -        | -    |               |                                                                 |          |        |        |
|                                                                                                                                                                                                                                                                                                      |    |           |          | KANSL1     | KANSL1     | -        | -    |               |                                                                 |          |        |        |
|                                                                                                                                                                                                                                                                                                      |    |           |          | MAPT       | -          | -        | -    |               |                                                                 |          |        |        |
| rs62621197                                                                                                                                                                                                                                                                                           | 19 | 8605262   | ADAMTS10 | -          | -          | -        | -    | NFILZ         | ADAMTS10, MYO1F                                                 | ADAMTS10 | 25022  | 3.79   |
|                                                                                                                                                                                                                                                                                                      |    |           |          |            |            |          |      |               |                                                                 | MYO1F    | 84484  | 1.85   |
| <b>European-ancestry analysis</b>                                                                                                                                                                                                                                                                    |    |           |          |            |            |          |      |               |                                                                 |          |        |        |
| rs143973349                                                                                                                                                                                                                                                                                          | 7  | 128866182 | ATP6V1F  | KCP        | -          | KCP      |      | CCDC136, CALU | FLNC, ATP6V1F, KCP, CCDC136, OP1SW, IRF5                        | FLNC     | 35776  | 291.60 |
|                                                                                                                                                                                                                                                                                                      |    |           |          | -          | CCDC136    | -        |      |               |                                                                 | CCDC136  | 435371 | 1.28   |
|                                                                                                                                                                                                                                                                                                      |    |           |          |            |            |          |      |               |                                                                 | KCP      | 4140   | 0.17   |
| rs59765302                                                                                                                                                                                                                                                                                           | 16 | 30018280  | DOC2A    | -          | -          | -        | -    | MVP           | DOC2A                                                           | DOC2A    | 1450   | 0.25   |
| *eQTLs determined using lead variants or proxy variants ( $r^2 \geq 0.8$ ) using all-population or European-ancestry linkage disequilibrium maps from the 1,000 Genomes Project                                                                                                                      |    |           |          |            |            |          |      |               |                                                                 |          |        |        |
| †Candidate genes prioritized on the basis of closest proximity to the lead variant, eQTLs, TWAS, tissue-specific expression levels, Hi-C analysis, and biologic plausibility based on previously reported data and are supported by at least two lines of evidence, except where otherwise specified |    |           |          |            |            |          |      |               |                                                                 |          |        |        |
| ‡Expression levels derived from bulk tissue samples available in GTEx v8                                                                                                                                                                                                                             |    |           |          |            |            |          |      |               |                                                                 |          |        |        |

**Supplementary Table 3.** Variants with suggestive associations with CMR-derived left ventricular mass index in the mixed-ancestry GWAS

| rsID        | Chr | Position  | Closest gene(s) | Function | Risk/alt allele | RAF  | Beta  | SE   | P-value*             |
|-------------|-----|-----------|-----------------|----------|-----------------|------|-------|------|----------------------|
|             |     | (hg 38)   |                 |          |                 |      |       |      |                      |
| rs140620427 | 2   | 66552028  | <i>MEIS1</i>    | Intronic | G/GAC           | 0.64 | -0.40 | 0.08 | 4.8x10 <sup>-7</sup> |
| rs80197559  | 3   | 134708638 | <i>EPHB1</i>    | Intronic | A/T             | 0.93 | 0.71  | 0.14 | 6.3x10 <sup>-7</sup> |
| -           | 3   | 169759203 | <i>ACTRT3</i>   | -        | CAA/C           | 0.75 | 0.44  | 0.09 | 3.4x10 <sup>-7</sup> |
| rs13108245  | 4   | 56924039  | <i>REST</i>     | Intronic | A/G             | 0.61 | 0.38  | 0.08 | 7.8x10 <sup>-7</sup> |
| rs36034102  | 4   | 80280894  | <i>FGF5</i>     | Intronic | G/T             | 0.73 | -0.44 | 0.08 | 1.0x10 <sup>-7</sup> |
| rs7708324   | 5   | 148540531 | <i>HTR4</i>     | Intronic | A/G             | 0.62 | -0.38 | 0.08 | 4.2x10 <sup>-7</sup> |
| rs234478    | 6   | 124040001 | <i>NKAIN2</i>   | Intronic | A/G             | 0.52 | 0.39  | 0.07 | 1.4x10 <sup>-7</sup> |
| rs17172722  | 7   | 46580714  | <i>IGFBP3</i>   | -        | C/T             | 0.58 | -0.40 | 0.08 | 1.3x10 <sup>-7</sup> |
| rs73238147  | 7   |           | <i>FLNC</i>     | Intronic | T/C             | 0.86 | 0.56  | 0.11 | 1.4x10 <sup>-7</sup> |
| rs35886223  | 7   | 129370466 | <i>AHCYL2</i>   | Intronic | G/A             | 0.67 | 0.41  | 0.08 | 3.1x10 <sup>-7</sup> |
| rs76540339  | 10  | 18538957  | <i>CACNB2</i>   | Intronic | A/C             | 0.87 | 0.58  | 0.11 | 7.6x10 <sup>-8</sup> |
| rs12253621  | 10  | 70680191  | <i>ADAMTS14</i> | Intronic | G/C             | 0.74 | 0.44  | 0.09 | 2.1x10 <sup>-7</sup> |
| rs111555687 | 10  | 89819910  | <i>KIF20B</i>   | -        | T/C             | 0.98 | 1.30  | 0.25 | 1.4x10 <sup>-7</sup> |
| rs621679    | 11  | 1881538   | <i>LSP1</i>     | Intronic | G/A             | 0.63 | -0.41 | 0.08 | 6.1x10 <sup>-8</sup> |
| -           | 11  | 47927816  | <i>PTPRJ</i>    | -        | CAA..C          | 0.33 | 0.40  | 0.08 | 9.7x10 <sup>-7</sup> |
| rs35443     | 12  | 115115073 | <i>TBX3</i>     | -        | G/C             | 0.61 | 0.40  | 0.08 | 1.6x10 <sup>-7</sup> |
| rs73468773  | 15  | 65274657  | <i>PARP16</i>   | Intronic | C/G             | 0.97 | -1.02 | 0.20 | 6.2x10 <sup>-7</sup> |
| rs6598541   | 15  | 98727906  | <i>IGF1R</i>    | Intronic | A/G             | 0.36 | -0.42 | 0.08 | 4.6x10 <sup>-8</sup> |

\*Denotes two-sided p-value corresponding to BOLT-LMM  $\chi^2$  statistic  
Chr = chromosome; RAF = risk allele frequency

**Supplementary Table 4.** Variants associated with unindexed CMR-derived left ventricular mass

| rsID                                                                                                                                                                                                                                                                             | Chr | Position  | Closest gene(s)            | Function | Risk/alt allele | RAF  | Beta  | SE   | P-value*              |
|----------------------------------------------------------------------------------------------------------------------------------------------------------------------------------------------------------------------------------------------------------------------------------|-----|-----------|----------------------------|----------|-----------------|------|-------|------|-----------------------|
|                                                                                                                                                                                                                                                                                  |     | (hg 38)   |                            |          |                 |      |       |      |                       |
| rs2255167 <sup>†</sup>                                                                                                                                                                                                                                                           | 2   | 178693555 | <i>TTN</i>                 | Intronic | T/A             | 0.81 | 1.83  | 0.20 | 3.2x10 <sup>-19</sup> |
| -                                                                                                                                                                                                                                                                                | 5   | 133066736 | <i>HSPA4</i>               | Indel    | CTT/C           | 0.72 | 1.02  | 0.18 | 2.5x10 <sup>-8</sup>  |
| rs9388498                                                                                                                                                                                                                                                                        | 6   | 126552277 | <i>CENPW</i>               | -        | G/T             | 0.81 | -1.43 | 0.21 | 2.1x10 <sup>-11</sup> |
| rs3729989                                                                                                                                                                                                                                                                        | 11  | 47348490  | <i>MYBPC3</i>              | Missense | T/C             | 0.87 | -1.32 | 0.24 | 3.3x10 <sup>-8</sup>  |
| rs10878349                                                                                                                                                                                                                                                                       | 12  | 65933852  | <i>HMGA2</i> <sup>‡</sup>  | Intronic | A/G             | 0.49 | 0.99  | 0.16 | 1.5x10 <sup>-9</sup>  |
| -                                                                                                                                                                                                                                                                                | 13  | 49990968  | <i>TRIM13</i> <sup>‡</sup> | Indel    | ACT/A           | 0.98 | -3.20 | 0.59 | 4.7x10 <sup>-8</sup>  |
| rs4985155                                                                                                                                                                                                                                                                        | 16  | 15035602  | <i>PDXDC1</i>              | Intronic | A/G             | 0.66 | 1.00  | 0.17 | 5.9x10 <sup>-9</sup>  |
| rs112555002                                                                                                                                                                                                                                                                      | 16  | 29909744  | <i>SEZ6L2</i> <sup>‡</sup> |          | T/TTC           | 0.68 | -1.02 | 0.18 | 2.1x10 <sup>-8</sup>  |
| rs1421085                                                                                                                                                                                                                                                                        | 16  | 53767042  | <i>FTO</i> <sup>‡</sup>    | Intronic | T/C             | 0.60 | -1.03 | 0.17 | 7.6x10 <sup>-10</sup> |
| rs6503451                                                                                                                                                                                                                                                                        | 17  | 45870981  | <i>MAPT</i>                | Intronic | T/C             | 0.67 | -1.01 | 0.18 | 1.0x10 <sup>-9</sup>  |
| rs62621197                                                                                                                                                                                                                                                                       | 19  | 8605262   | <i>ADAMTS10</i>            | Missense | C/T             | 0.96 | 2.85  | 0.45 | 2.8x10 <sup>-10</sup> |
| <p>*Denotes two-sided p-value corresponding to BOLT-LMM <math>\chi^2</math> statistic<br/> <sup>†</sup>Locus previously reported for LV mass<sup>1</sup><br/> <sup>‡</sup>Variant association unique to unindexed LV mass<br/> Chr = chromosome; RAF = risk allele frequency</p> |     |           |                            |          |                 |      |       |      |                       |

**Supplementary Table 5.** Variants associated with CMR-derived left ventricular mass index in the European-ancestry GWAS

| rsID                     | Chr | Position  | Closest gene(s) | Function | Risk/alt allele | RAF  | Beta  | SE   | P-value*              |
|--------------------------|-----|-----------|-----------------|----------|-----------------|------|-------|------|-----------------------|
|                          |     | (hg 38)   |                 |          |                 |      |       |      |                       |
| rs143800963              | 1   | 11835418  | <i>CLCN6</i>    | Intronic | C/A             | 0.95 | 0.98  | 0.17 | 6.8x10 <sup>-9</sup>  |
| rs2255167 <sup>†</sup>   | 2   | 178693555 | <i>TTN</i>      | Intronic | T/A             | 0.81 | 0.98  | 0.10 | 5.9x10 <sup>-24</sup> |
| rs10497529 <sup>‡</sup>  | 2   | 178975161 | <i>CCDC141</i>  | Missense | G/A             | 0.96 | 1.28  | 0.21 | 1.0x10 <sup>-9</sup>  |
| -                        | 5   | 133066736 | <i>HSPA4</i>    | Indel    | CTT/C           | 0.72 | 0.47  | 0.09 | 4.4x10 <sup>-8</sup>  |
| rs9388498                | 6   | 126552277 | <i>CENPW</i>    | -        | G/T             | 0.81 | -0.58 | 0.10 | 5.6x10 <sup>-9</sup>  |
| rs143973349 <sup>§</sup> | 7   | 128866181 | <i>ATP6V1F</i>  | Indel    | TGG/T           | 0.82 | 0.57  | 0.10 | 1.0x10 <sup>-8</sup>  |
| rs11000728               | 10  | 73644542  | <i>MYOZ1</i>    | Intronic | C/G             | 0.86 | -0.61 | 0.11 | 3.7x10 <sup>-8</sup>  |
| rs61897389               | 11  | 47358536  | <i>SPI1</i>     | Intronic | G/T             | 0.86 | -0.64 | 0.11 | 1.2x10 <sup>-8</sup>  |
| rs28552516               | 12  | 121592356 | <i>KDM2B</i>    | Intronic | C/T             | 0.85 | -0.65 | 0.11 | 1.4x10 <sup>-9</sup>  |
| rs56252725               | 16  | 14995819  | <i>PDXDC1</i>   | Intronic | G/A             | 0.75 | 0.53  | 0.10 | 4.5x10 <sup>-8</sup>  |
| rs142032045 <sup>§</sup> | 16  | 30018280  | <i>DOC2A</i>    | Indel    | C/CA            | 0.61 | -0.45 | 0.08 | 3.9x10 <sup>-8</sup>  |
| rs6503451                | 17  | 45870981  | <i>MAPT</i>     | Intronic | T/C             | 0.67 | -0.54 | 0.08 | 6.9x10 <sup>-11</sup> |
| rs199530 <sup>#</sup>    | 17  | 46759287  | <i>NSF</i>      | Intronic | G/A             | 0.24 | 0.53  | 0.09 | 3.3x10 <sup>-9</sup>  |
| rs62621197               | 19  | 8605262   | <i>ADAMTS10</i> | Missense | C/T             | 0.96 | 1.24  | 0.21 | 3.7x10 <sup>-9</sup>  |

\*Denotes two-sided p-value corresponding to BOLT-LMM  $\chi^2$  statistic  
<sup>†</sup>Locus previously reported for LVM<sup>1</sup>  
<sup>‡</sup>Variants identified in conditional analysis conditioned on lead SNPs (beta, standard error, and p-value are adjusted)  
<sup>§</sup>Variants association unique to European ancestry analysis (excluding variants which are strong proxies [ $r^2 > 0.8$ ] for primary GWAS SNPs)  
<sup>#</sup>Association no longer observed in analysis conditioned on rs6503451  
Chr = chromosome; RAF = risk allele frequency



**Supplementary Table 6.** Variants associated with CMR-derived left ventricular mass indexed using the 2.7<sup>th</sup> power of height

| rsID                    | Chr | Position  | Closest gene(s) | Function | Risk/alt allele | RAF  | Beta  | SE    | P-value*              |
|-------------------------|-----|-----------|-----------------|----------|-----------------|------|-------|-------|-----------------------|
|                         |     | (hg 38)   |                 |          |                 |      |       |       |                       |
| rs2255167 <sup>†</sup>  | 2   | 178693555 | <i>TTN</i>      | Intronic | T/A             | 0.81 | 0.41  | 0.047 | 1.4x10 <sup>-18</sup> |
| rs571173399             | 5   | 133106107 | <i>HSPA4</i>    | Intronic | T/G             | 0.77 | 0.25  | 0.044 | 1.1x10 <sup>-8</sup>  |
| rs28552516              | 12  | 121592356 | <i>KDM2B</i>    | Intronic | C/T             | 0.85 | -0.30 | 0.052 | 4.0x10 <sup>-9</sup>  |
| rs1421085               | 16  | 53767042  | <i>FTO</i>      | Intronic | T/C             | 0.60 | -0.25 | 0.038 | 4.0x10 <sup>-11</sup> |
| rs6503451               | 17  | 45870981  | <i>MAPT</i>     | Intronic | T/C             | 0.67 | -0.26 | 0.041 | 1.3x10 <sup>-10</sup> |
| rs62071449 <sup>‡</sup> | 17  | 46613342  | <i>NSF</i>      | Intronic | G/A             | 0.81 | -0.29 | 0.050 | 7.3x10 <sup>-9</sup>  |

\*Denotes two-sided p-value corresponding to BOLT-LMM  $\chi^2$  statistic  
<sup>†</sup>Locus previously reported for LVM<sup>1</sup>  
<sup>‡</sup>Association no longer observed in analysis conditioned on rs6503451  
Chr., chromosome; RAF, risk allele frequency

**Supplementary Table 7.** Variants associated with CMR-derived left ventricular mass after rank-based inverse normal transformation

| rsID                    | Chr | Position  | Closest gene(s) | Function | Risk/alt allele | RAF  | Beta   | SE     | P-value*              |
|-------------------------|-----|-----------|-----------------|----------|-----------------|------|--------|--------|-----------------------|
|                         |     | (hg 38)   |                 |          |                 |      |        |        |                       |
| rs143800963             | 1   | 11835418  | <i>CLCN6</i>    | Intronic | C/A             | 0.95 | 0.077  | 0.0133 | 6.5x10 <sup>-9</sup>  |
| rs2255167 <sup>†</sup>  | 2   | 178693555 | <i>TTN</i>      | Intronic | T/A             | 0.81 | 0.079  | 0.0075 | 1.5x10 <sup>-26</sup> |
| rs10497529 <sup>‡</sup> | 2   | 178975161 | <i>CCDC141</i>  | Missense | G/A             | 0.96 | 0.100  | 0.0165 | 6.9x10 <sup>-10</sup> |
| rs36034102              | 4   | 80280894  | <i>FGF5</i>     | Intronic | G/T             | 0.73 | -0.038 | 0.0068 | 2.7x10 <sup>-8</sup>  |
| -                       | 5   | 133066736 | <i>HSPA4</i>    | Indel    | CTT/C           | 0.72 | 0.041  | 0.0067 | 1.1x10 <sup>-9</sup>  |
| rs9388498               | 6   | 126552277 | <i>CENPW</i>    | -        | G/T             | 0.81 | -0.045 | 0.0079 | 3.4x10 <sup>-9</sup>  |
| rs76540339              | 10  | 18538957  | <i>CACNB2</i>   | Intronic | A/C             | 0.87 | 0.051  | 0.0087 | 8.2x10 <sup>-9</sup>  |
| rs34163229              | 10  | 73647154  | <i>SYNPO2L</i>  | Missense | G/T             | 0.86 | -0.049 | 0.0085 | 6.6x10 <sup>-9</sup>  |
| rs3729989               | 11  | 47348490  | <i>MYBPC3</i>   | Missense | T/C             | 0.87 | -0.051 | 0.0087 | 8.1x10 <sup>-9</sup>  |
| rs28552516              | 12  | 121592356 | <i>KDM2B</i>    | Intronic | C/T             | 0.85 | -0.050 | 0.0083 | 2.5x10 <sup>-9</sup>  |
| rs6598541               | 15  | 98727906  | <i>IGF1R</i>    | Intronic | A/G             | 0.36 | -0.035 | 0.0062 | 3.9x10 <sup>-8</sup>  |
| rs11376559              | 16  | 14995819  | <i>PDXDC1</i>   | Intronic | C/CA            | 0.70 | 0.039  | 0.0066 | 2.4x10 <sup>-9</sup>  |
| rs6503451               | 17  | 45870981  | <i>MAPT</i>     | Intronic | T/C             | 0.67 | -0.043 | 0.0065 | 4.8x10 <sup>-11</sup> |
| rs199502 <sup>§</sup>   | 17  | 46785247  | <i>WNT3</i>     | Intronic | G/A             | 0.79 | -0.044 | 0.0073 | 1.5x10 <sup>-9</sup>  |

\*Denotes two-sided p-value corresponding to BOLT-LMM  $\chi^2$  statistic  
<sup>†</sup>Locus previously reported for LVM<sup>1</sup>  
<sup>‡</sup>Variant identified in conditional analysis conditioned on lead SNPs (beta, standard error, and p-value are adjusted)  
<sup>§</sup>Association no longer observed in analysis conditioned on rs6503451  
Chr., chromosome; RAF, risk allele frequency

**Supplementary Table 8.** Variants associated with CMR-derived left ventricular mass indexed using lean body mass

| rsID                    | Chr | Position  | Closest gene(s) | Function   | Risk/alt allele | RAF  | Beta  | SE     | P-value*              |
|-------------------------|-----|-----------|-----------------|------------|-----------------|------|-------|--------|-----------------------|
|                         |     | (hg 38)   |                 |            |                 |      |       |        |                       |
| rs143800963             | 1   | 11835418  | <i>CLCN6</i>    | Intronic   | C/A             | 0.95 | 0.08  | 0.0149 | 3.9x10 <sup>-8</sup>  |
| rs4233937               | 2   | 66525119  | <i>MEIS1</i>    | Intronic   | A/G             | 0.39 | 0.04  | 0.0068 | 3.8x10 <sup>-8</sup>  |
| rs2255167 <sup>†</sup>  | 2   | 178693555 | <i>TTN</i>      | Intronic   | T/A             | 0.81 | 0.09  | 0.0084 | 7.2x10 <sup>-29</sup> |
| rs10497529 <sup>‡</sup> | 2   | 178975161 | <i>CCDC141</i>  | Missense   | G/A             | 0.96 | 0.04  | 0.0069 | 8.8x10 <sup>-11</sup> |
| rs36034102              | 4   | 80280894  | <i>FGF5</i>     | Intronic   | G/T             | 0.73 | -0.04 | 0.0076 | 1.5x10 <sup>-8</sup>  |
| -                       | 5   | 133066736 | <i>HSPA4</i>    | Indel      | CTT/C           | 0.72 | 0.05  | 0.0075 | 4.0x10 <sup>-11</sup> |
| rs73238147              | 7   | 128829863 | <i>FLNC</i>     | Intronic   | T/C             | 0.86 | 0.05  | 0.0097 | 3.8x10 <sup>-8</sup>  |
| rs72814544              | 10  | 70695167  | <i>ADAMTS14</i> | Intronic   | G/A             | 0.77 | 0.04  | 0.0079 | 3.2x10 <sup>-8</sup>  |
| rs28489288              | 12  | 121587314 | <i>KDM2B</i>    | Intronic   | A/G             | 0.85 | -0.05 | 0.0093 | 7.0x10 <sup>-9</sup>  |
| rs6598541               | 15  | 98727906  | <i>IGF1R</i>    | Intronic   | A/G             | 0.36 | -0.04 | 0.0070 | 8.6x10 <sup>-10</sup> |
| rs5816114               | 16  | 15005317  | <i>PDXDC1</i>   | Indel      | A/AAAAAAG       | 0.65 | 0.04  | 0.0079 | 2.4x10 <sup>-8</sup>  |
| rs62073222              | 17  | 46297344  | <i>LRRC37A</i>  | Synonymous | A/G             | 0.27 | 0.05  | 0.0082 | 1.3x10 <sup>-8</sup>  |
| rs62621197              | 19  | 8605262   | <i>ADAMTS10</i> | Missense   | C/T             | 0.96 | 0.11  | 0.0185 | 7.6x10 <sup>-10</sup> |

\*Denotes two-sided p-value corresponding to BOLT-LMM  $\chi^2$  statistic  
<sup>†</sup>Locus previously reported for LVM<sup>1</sup>  
<sup>‡</sup>Variant identified in conditional analysis conditioned on lead SNPs (beta, standard error, and p-value are adjusted)  
Chr., chromosome; RAF, risk allele frequency

**Supplementary Table 9.** Variants associated with CMR-derived indexed left ventricular mass index excluding individuals with heart failure and coronary artery disease

| rsID                    | Chr | Position  | Closest gene(s) | Function   | Risk/alt allele | RAF  | Beta  | SE     | P-value*              |
|-------------------------|-----|-----------|-----------------|------------|-----------------|------|-------|--------|-----------------------|
|                         |     | (hg 38)   |                 |            |                 |      |       |        |                       |
| rs143800963             | 1   | 11835418  | <i>CLCN6</i>    | Intronic   | C/A             | 0.95 | 0.08  | 0.0149 | 3.9x10 <sup>-8</sup>  |
| rs4233937               | 2   | 66525119  | <i>MEIS1</i>    | Intronic   | A/G             | 0.39 | 0.04  | 0.0068 | 3.8x10 <sup>-8</sup>  |
| rs2255167 <sup>†</sup>  | 2   | 178693555 | <i>TTN</i>      | Intronic   | T/A             | 0.81 | 0.09  | 0.0084 | 7.2x10 <sup>-29</sup> |
| rs10497529 <sup>‡</sup> | 2   | 178975161 | <i>CCDC141</i>  | Missense   | G/A             | 0.96 | 0.12  | 0.0185 | 8.8x10 <sup>-11</sup> |
| rs36034102              | 4   | 80280894  | <i>FGF5</i>     | Intronic   | G/T             | 0.73 | -0.04 | 0.0076 | 1.5x10 <sup>-8</sup>  |
| -                       | 5   | 133066736 | <i>HSPA4</i>    | Indel      | CTT/C           | 0.72 | 0.05  | 0.0075 | 4.0x10 <sup>-11</sup> |
| rs73238147              | 7   | 128829863 | <i>FLNC</i>     | Intronic   | T/C             | 0.86 | 0.05  | 0.0097 | 3.8x10 <sup>-8</sup>  |
| rs72814544              | 10  | 70695167  | <i>ADAMTS14</i> | Intronic   | G/A             | 0.77 | 0.04  | 0.0079 | 3.2x10 <sup>-8</sup>  |
| rs28489288              | 12  | 121587314 | <i>KDM2B</i>    | Intronic   | A/G             | 0.85 | -0.05 | 0.0093 | 7.0x10 <sup>-9</sup>  |
| rs6598541               | 15  | 98727906  | <i>IGF1R</i>    | Intronic   | A/G             | 0.36 | -0.04 | 0.0070 | 8.6x10 <sup>-10</sup> |
| rs5816114               | 16  | 15005317  | <i>PDXDC1</i>   | Indel      | A/AAAAAAG       | 0.65 | 0.04  | 0.0079 | 2.4x10 <sup>-8</sup>  |
| rs62073222              | 17  | 46297344  | <i>LRRC37A</i>  | Synonymous | A/G             | 0.27 | 0.05  | 0.0082 | 1.3x10 <sup>-8</sup>  |
| rs62621197              | 19  | 8605262   | <i>ADAMTS10</i> | Missense   | C/T             | 0.96 | 0.11  | 0.0185 | 7.6x10 <sup>-10</sup> |

\*Denotes two-sided p-value corresponding to BOLT-LMM  $\chi^2$  statistic  
<sup>†</sup>Locus previously reported for LVM<sup>1</sup>  
<sup>‡</sup>Variants identified in conditional analysis conditioned on lead SNPs (beta, standard error, and p-value are adjusted)  
Chr., chromosome; RAF, risk allele frequency

**Supplementary Table 10.** Variants associated with unindexed CMR-derived left ventricular mass conditioned on height and weight

| rsID                   | Chr | Position  | Closest gene(s) | Function   | Risk/alt allele | RAF  | Beta  | SE    | P-value*              |
|------------------------|-----|-----------|-----------------|------------|-----------------|------|-------|-------|-----------------------|
|                        |     | (hg 38)   |                 |            |                 |      |       |       |                       |
| rs143800963            | 1   | 11835418  | <i>CLCN6</i>    | Intronic   | C/A             | 0.95 | 1.64  | 0.297 | 3.3x10 <sup>-8</sup>  |
| rs2255167 <sup>†</sup> | 2   | 178693555 | <i>TTN</i>      | Intronic   | T/A             | 0.81 | 1.87  | 0.168 | 3.2x10 <sup>-29</sup> |
| -                      | 3   | 169759203 | <i>ACTRT3</i>   | Indel      | CAA/C           | 0.75 | 0.85  | 0.154 | 4.5x10 <sup>-8</sup>  |
| -                      | 5   | 133066736 | <i>HSPA4</i>    | Indel      | CTT/C           | 0.72 | 0.85  | 0.149 | 1.0x10 <sup>-8</sup>  |
| rs62388970             | 5   | 148528822 | <i>HTR4</i>     | Intronic   | G/A             | 0.62 | -0.77 | 0.137 | 1.7x10 <sup>-8</sup>  |
| rs13198983             | 6   | 126863841 | <i>RSPO3</i>    | -          | G/A             | 0.60 | -0.76 | 0.139 | 4.1x10 <sup>-8</sup>  |
| rs848466               | 7   | 77963290  | <i>PHTF2</i>    | -          | T/C             | 0.49 | -0.78 | 0.133 | 4.0x10 <sup>-9</sup>  |
| rs13230127             | 7   | 128859806 | <i>ATP6V1F</i>  | Intronic   | C/T             | 0.87 | 1.13  | 0.196 | 1.1x10 <sup>-8</sup>  |
| rs35886223             | 7   | 129370466 | <i>AHCYL2</i>   | Intronic   | G/A             | 0.67 | 0.80  | 0.144 | 2.4x10 <sup>-8</sup>  |
| rs34163229             | 10  | 73647154  | <i>SYNPO2L</i>  | Missense   | G/T             | 0.86 | -1.21 | 0.191 | 2.0x10 <sup>-10</sup> |
| rs111555687            | 10  | 89819910  | <i>KIF20B</i>   | -          | T/C             | 0.98 | 2.54  | 0.448 | 1.4x10 <sup>-8</sup>  |
| rs4980386              | 11  | 1874478   | <i>LSP1</i>     | Intronic   | C/A             | 0.62 | -0.83 | 0.137 | 1.5x10 <sup>-9</sup>  |
| rs35443                | 12  | 115115073 | <i>TBX3</i>     | -          | G/C             | 0.61 | 0.74  | 0.136 | 4.2x10 <sup>-8</sup>  |
| rs6598541              | 15  | 98727906  | <i>IGF1R</i>    | Intronic   | A/G             | 0.36 | -0.81 | 0.139 | 5.5x10 <sup>-9</sup>  |
| rs11376559             | 16  | 15037797  | <i>PDXDC1</i>   | Indel      | C/CA            | 0.70 | 0.83  | 0.146 | 1.2x10 <sup>-8</sup>  |
| rs77727624             | 17  | 45713404  | <i>CRHR1</i>    | Intronic   | A/G             | 0.78 | -1.02 | 0.161 | 1.6x10 <sup>-10</sup> |
| rs62073222             | 17  | 46297344  | <i>LRRC37A</i>  | Synonymous | A/G             | 0.27 | 1.12  | 0.162 | 5.9x10 <sup>-12</sup> |
| rs151269919            | 17  | 46816119  | <i>WNT3</i>     | Indel      | A/ACACA...      | 0.36 | 0.80  | 0.144 | 3.8x10 <sup>-8</sup>  |

\*Denotes two-sided p-value corresponding to BOLT-LMM  $\chi^2$  statistic

<sup>†</sup>Locus previously reported for LVM<sup>1</sup>

Chr., chromosome; RAF, risk allele frequency

**Supplementary Table 11.** Associations with CMR-derived left ventricular mass across varying indexing methods

|                         |     |                    |                    | Body surface area |                       | Body surface area<br>(rank-inverse normal transformation) |                       | 2.7 <sup>th</sup> power of height |                       | Lean body mass    |                       |
|-------------------------|-----|--------------------|--------------------|-------------------|-----------------------|-----------------------------------------------------------|-----------------------|-----------------------------------|-----------------------|-------------------|-----------------------|
| rsID <sup>†</sup>       | Chr | Position<br>(hg38) | Closest<br>gene(s) | Beta <sup>†</sup> | P-value*              | Beta <sup>‡</sup>                                         | P-value*              | Beta <sup>‡</sup>                 | P-value*              | Beta <sup>‡</sup> | P-value*              |
| rs143800963             | 1   | 11835418           | <i>CLCN6</i>       | 0.078             | 4.2x10 <sup>-9</sup>  | 0.077                                                     | 6.5x10 <sup>-9</sup>  | 0.073                             | 2.5x10 <sup>-7</sup>  | 0.082             | 3.9x10 <sup>-8</sup>  |
| rs2255167               | 2   | 178693555          | <i>TTN</i>         | 0.079             | 3.2x10 <sup>-26</sup> | 0.079                                                     | 1.5x10 <sup>-26</sup> | 0.071                             | 1.4x10 <sup>-18</sup> | 0.094             | 7.2x10 <sup>-29</sup> |
| rs10497529 <sup>§</sup> | 2   | 178975161          | <i>CCDC141</i>     | 0.100             | 3.0x10 <sup>-10</sup> | 0.100                                                     | 6.9x10 <sup>-10</sup> | 0.095                             | 6.0x10 <sup>-8</sup>  | 0.120             | 8.8x10 <sup>-11</sup> |
| -                       | 5   | 133066736          | <i>HSPA4</i>       | 0.041             | 1.6x10 <sup>-9</sup>  | 0.041                                                     | 1.1x10 <sup>-9</sup>  | 0.040                             | 2.7x10 <sup>-8</sup>  | 0.049             | 4.0x10 <sup>-11</sup> |
| rs9388498               | 6   | 126552277          | <i>CENPW</i>       | -0.045            | 4.1x10 <sup>-9</sup>  | -0.045                                                    | 3.4x10 <sup>-9</sup>  | -0.042                            | 3.4x10 <sup>-7</sup>  | -0.045            | 2.1x10 <sup>-7</sup>  |
| rs34163229              | 10  | 73647154           | <i>SYNPO2L</i>     | -0.049            | 1.0x10 <sup>-8</sup>  | -0.049                                                    | 6.6x10 <sup>-9</sup>  | -0.049                            | 1.1x10 <sup>-7</sup>  | -0.051            | 9.8x10 <sup>-8</sup>  |
| rs3729989               | 11  | 47348490           | <i>MYBPC3</i>      | -0.050            | 1.8x10 <sup>-8</sup>  | -0.051                                                    | 8.1x10 <sup>-9</sup>  | -0.047                            | 4.9x10 <sup>-7</sup>  | -0.049            | 8.0x10 <sup>-7</sup>  |
| rs28552516              | 12  | 121592356          | <i>KDM2B</i>       | -0.047            | 1.5x10 <sup>-8</sup>  | -0.050                                                    | 2.5x10 <sup>-9</sup>  | -0.052                            | 4.0x10 <sup>-9</sup>  | -0.054            | 7.3x10 <sup>-9</sup>  |
| rs6598541               | 15  | 98727906           | <i>IGF1R</i>       | -0.034            | 4.6x10 <sup>-8</sup>  | -0.035                                                    | 3.9x10 <sup>-8</sup>  | -0.035                            | 1.8x10 <sup>-7</sup>  | -0.043            | 1.0x10 <sup>-9</sup>  |
| rs56252725              | 16  | 14995819           | <i>PDXDC1</i>      | 0.044             | 3.7x10 <sup>-9</sup>  | 0.044                                                     | 3.0x10 <sup>-9</sup>  | 0.039                             | 9.0x10 <sup>-7</sup>  | 0.045             | 8.5x10 <sup>-8</sup>  |
| rs6503451               | 17  | 45870981           | <i>MAPT</i>        | -0.042            | 1.1x10 <sup>-10</sup> | -0.043                                                    | 4.8x10 <sup>-11</sup> | -0.045                            | 1.3x10 <sup>-10</sup> | -0.041            | 1.9x10 <sup>-8</sup>  |
| rs199501                | 17  | 46785247           | <i>WNT3</i>        | 0.043             | 1.1x10 <sup>-9</sup>  | 0.042                                                     | 3.1x10 <sup>-9</sup>  | 0.043                             | 1.0x10 <sup>-8</sup>  | 0.039             | 6.1x10 <sup>-7</sup>  |
| rs62621197              | 19  | 8605262            | <i>ADAMTS10</i>    | 0.091             | 2.9x10 <sup>-8</sup>  | 0.088                                                     | 6.6x10 <sup>-8</sup>  | 0.060                             | 4.9x10 <sup>-4</sup>  | 0.110             | 7.6x10 <sup>-10</sup> |

\*Denotes two-sided p-value corresponding to BOLT-LMM  $\chi^2$  statistic  
<sup>†</sup>Variants shown are those significant in the primary GWAS  
<sup>‡</sup>All betas are presented per 1-standard deviation increase to facilitate comparisons  
<sup>§</sup>Variant identified in conditional analysis conditioned on lead SNPs using respective indexing method (beta, standard error, and p-value are adjusted)

**Supplementary Table 12.** Prior associations of lead variants with CMR-derived left ventricular measurements and cardiovascular traits

| rsID                                | Chr | Position (hg38) | Prioritized candidate gene(s)                                   | Beta (SE)       | P-value*              | Prior associations with left ventricular measurements <sup>†</sup>                                                                                                                                                 | Prior associations with cardiovascular traits <sup>†</sup>                                                                                 |
|-------------------------------------|-----|-----------------|-----------------------------------------------------------------|-----------------|-----------------------|--------------------------------------------------------------------------------------------------------------------------------------------------------------------------------------------------------------------|--------------------------------------------------------------------------------------------------------------------------------------------|
| <b>Primary association analysis</b> |     |                 |                                                                 |                 |                       |                                                                                                                                                                                                                    |                                                                                                                                            |
| rs143800963                         | 1   | 11835418        | <i>CLCN6</i><br><i>NPPA</i><br><i>NPPB</i>                      | 0.95<br>(0.16)  | 4.2x10 <sup>-9</sup>  |                                                                                                                                                                                                                    | Systolic BP (rs6669371 <sup>2</sup> ), NTproBNP levels (rs1023252 <sup>3</sup> )                                                           |
| rs2255167                           | 2   | 178693555       | <i>TTN</i><br><i>FKBP7</i>                                      | 0.97<br>(0.09)  | 3.2x10 <sup>-26</sup> | LVM (rs225516 <sup>1</sup> ), LVEDV (rs2042995 <sup>1</sup> ), LVESV (rs2042995 <sup>1</sup> , rs2562845 <sup>4</sup> ), LVESVi (rs2562845 <sup>4</sup> ), LVEF (rs2042995 <sup>1</sup> , rs2562845 <sup>4</sup> ) | DCM (rare variants <sup>5</sup> ), HCM (rare variants <sup>6</sup> ), atrial fibrillation (rare variants <sup>7</sup> )                    |
| rs10497529                          | 2   | 178975161       | <i>TTN</i><br><i>CCDC141</i>                                    | 1.28<br>(0.20)  | 2.2x10 <sup>-9</sup>  |                                                                                                                                                                                                                    | Resting heart rate (rs10497529 <sup>8</sup> ), peak oxygen consumption (rs10497529 <sup>9</sup> )                                          |
| -                                   | 5   | 133066736       | <i>HSPA4</i>                                                    | 0.50<br>(0.08)  | 1.6x10 <sup>-9</sup>  |                                                                                                                                                                                                                    | Systolic BP (rs62374461 <sup>10</sup> ), diastolic BP (rs55747751 <sup>11</sup> )                                                          |
| rs9388498                           | 6   | 126552277       | <i>CENPW</i>                                                    | -0.55<br>(0.10) | 4.1x10 <sup>-9</sup>  |                                                                                                                                                                                                                    | Coronary artery disease (rs1591805 <sup>12</sup> ), Type 1 diabetes (rs1538171 <sup>13</sup> ), Type 2 diabetes (rs4897182 <sup>14</sup> ) |
| rs34163229                          | 10  | 73647154        | <i>SYNPO2L</i><br><i>MYOZ1</i><br><i>ANXA7</i><br><i>PPP3CB</i> | -0.60<br>(0.10) | 1.0x10 <sup>-8</sup>  |                                                                                                                                                                                                                    | Systolic BP (rs12247028 <sup>15</sup> ), atrial fibrillation (multiple <sup>16</sup> ), heart failure                                      |

|            |    |           |                                                                   |                 |                       |                                                                   |                                                                                                                                                                                                                              |
|------------|----|-----------|-------------------------------------------------------------------|-----------------|-----------------------|-------------------------------------------------------------------|------------------------------------------------------------------------------------------------------------------------------------------------------------------------------------------------------------------------------|
|            |    |           | <i>AGAP5</i>                                                      |                 |                       |                                                                   | (rs4746140 <sup>17</sup> ), QT interval (rs4746140 <sup>18</sup> ), PR interval (rs7394152 <sup>19</sup> )                                                                                                                   |
| rs3729989  | 11 | 47348490  | <i>MYBPC3</i><br><i>PSMC3</i>                                     | -0.61<br>(0.11) | 1.8x10 <sup>-8</sup>  |                                                                   | Systolic BP (rs2301216 <sup>10</sup> ), renin-angiotensin system inhibitor use (rs2856653 <sup>20</sup> ), HCM (rare variants <sup>21</sup> ), DCM (rare variants <sup>22</sup> )                                            |
| rs28552516 | 12 | 121592356 | <i>ORAI1</i>                                                      | -0.58<br>(0.10) | 1.5x10 <sup>-8</sup>  |                                                                   |                                                                                                                                                                                                                              |
| rs6598541  | 15 | 98727906  | <i>IGF1R</i>                                                      | -0.42<br>(0.08) | 4.6x10 <sup>-8</sup>  |                                                                   | TPE interval (rs2871974 <sup>23</sup> ), QRS duration (rs4966020 <sup>24</sup> ), atrial fibrillation (rs4965430 <sup>25</sup> )                                                                                             |
| rs56252725 | 16 | 14995819  | <i>PDXDC1</i><br><i>NOMO1</i><br><i>MYH11</i>                     | 0.54<br>(0.09)  | 3.7x10 <sup>-9</sup>  |                                                                   | Coronary artery disease (rs216158 <sup>26</sup> ), PR interval (rs72772025 <sup>19</sup> ), resting heart rate (rs3915499 <sup>27</sup> ), systolic BP (rs3915499 <sup>10</sup> ), ECG morphology (rs3915425 <sup>28</sup> ) |
| rs6503451  | 17 | 45870981  | <i>KANSL1</i><br><i>MAPT</i><br><i>LRRC37A</i><br><i>LRRC37A2</i> | -0.52<br>(0.08) | 1.1x10 <sup>-10</sup> | LVESV (rs242562 <sup>1</sup> )<br>LVESVi (rs242562 <sup>1</sup> ) | Systolic BP (rs3785880 <sup>10</sup> ), QRS amplitude (rs242562) <sup>29</sup>                                                                                                                                               |
| rs199501   | 17 | 46785247  | <i>WNT3</i><br><i>KANSL1</i><br><i>LRRC37A</i><br><i>LRRC37A2</i> | 0.55<br>(0.09)  | 1.1x10 <sup>9</sup>   | LVESV (rs242562 <sup>1</sup> )<br>LVESVi (rs242562 <sup>1</sup> ) | Atrial fibrillation (rs1563304 <sup>25</sup> )                                                                                                                                                                               |



|                                                                                                                                                                                                                                                                                                                                                                                                                                                                                                                                                                                                                                                                                         |    |           |                                 |                 |                       |                                                                                                         |                                                                                                                                                                                       |
|-----------------------------------------------------------------------------------------------------------------------------------------------------------------------------------------------------------------------------------------------------------------------------------------------------------------------------------------------------------------------------------------------------------------------------------------------------------------------------------------------------------------------------------------------------------------------------------------------------------------------------------------------------------------------------------------|----|-----------|---------------------------------|-----------------|-----------------------|---------------------------------------------------------------------------------------------------------|---------------------------------------------------------------------------------------------------------------------------------------------------------------------------------------|
| rs62621197                                                                                                                                                                                                                                                                                                                                                                                                                                                                                                                                                                                                                                                                              | 19 | 8605262   | <i>ADAMTS10</i><br><i>MYO1F</i> | 1.11<br>(0.20)  | 2.9x10 <sup>-8</sup>  |                                                                                                         |                                                                                                                                                                                       |
| <b>European ancestry analysis</b>                                                                                                                                                                                                                                                                                                                                                                                                                                                                                                                                                                                                                                                       |    |           |                                 |                 |                       |                                                                                                         |                                                                                                                                                                                       |
| rs143973349                                                                                                                                                                                                                                                                                                                                                                                                                                                                                                                                                                                                                                                                             | 7  | 128866181 | FLNC<br>CCDC136<br>KCP          | 0.57<br>(0.10)  | 1.0x10 <sup>-08</sup> | LVESV (rs34373805 <sup>1</sup> )<br>LVESVi (rs34373805 <sup>1</sup> )<br>LVEF (rs3807309 <sup>1</sup> ) | ECG morphology (rs56216811 <sup>28</sup> ),<br>arrhythmogenic CM (rare variants <sup>30</sup> ), HCM (rare variants <sup>31</sup> ),<br>restrictive CM (rare variants <sup>32</sup> ) |
| rs142032045                                                                                                                                                                                                                                                                                                                                                                                                                                                                                                                                                                                                                                                                             | 16 | 30018280  | <i>DOC2A</i>                    | -0.45<br>(0.08) | 3.9x10 <sup>-08</sup> |                                                                                                         |                                                                                                                                                                                       |
| <p>*Denotes two-sided p-value corresponding to BOLT-LMM <math>\chi^2</math> statistic<br/> †Traits listed for prior associations with the respective lead variant, a strong proxy (<math>r^2 \geq 0.80</math>), or a variant mapped to the same gene. The variant implicated in the prior analysis is listed in parenthesis.<br/> BP = blood pressure, Chr = chromosome; CM = cardiomyopathy, DCM = dilated cardiomyopathy, ECG = electrocardiogram, HCM = hypertrophic cardiomyopathy, LVEF = left ventricular ejection fraction; LVESV = left ventricular end-systolic volume; LVESVi = left ventricular end-systolic volume index, SE = standard error, TPE = T wave peak-to-end</p> |    |           |                                 |                 |                       |                                                                                                         |                                                                                                                                                                                       |

**Supplementary Table 13.** Associations between cardiac magnetic resonance-derived indexed LVM and incident cardiovascular disease

|                             | N events / N total* | Follow-up, years (Q1,Q3) | Hazard ratio for covariate (95% CI) <sup>†</sup> |                  |                                   |
|-----------------------------|---------------------|--------------------------|--------------------------------------------------|------------------|-----------------------------------|
|                             |                     |                          | LVMI (per 1 SD)                                  | LVH              | LVH (90 <sup>th</sup> percentile) |
| Atrial fibrillation         | 559 / 43004         | 2.7 (1.9, 4.1)           | 1.46 (1.36-1.58)                                 | 2.53 (2.02-3.17) | 2.37 (1.92-2.92)                  |
| Myocardial infarction       | 299 / 43217         | 2.7 (1.9, 4.1)           | 1.32 (1.19-1.47)                                 | 1.57 (1.09-2.26) | 1.53 (1.10-2.13)                  |
| Heart failure               | 267 / 44011         | 2.7 (1.9, 4.1)           | 1.89 (1.72-2.07)                                 | 4.95 (3.77-6.50) | 4.10 (3.15-5.35)                  |
| Ventricular arrhythmias     | 110 / 44194         | 2.7 (1.9, 4.1)           | 1.53 (1.30-1.79)                                 | 2.83 (1.74-4.60) | 2.35 (1.47-3.75)                  |
| Dilated cardiomyopathy      | 22 / 44297          | 2.7 (1.9, 4.1)           | 2.75 (2.20-3.44)                                 | 10.8 (4.67-25.2) | 11.4 (4.91-26.4)                  |
| Hypertrophic cardiomyopathy | 14 / 44295          | 2.7 (1.9, 4.1)           | 2.39 (1.83-3.12)                                 | 7.58 (2.46-23.3) | 5.97 (1.86-17.4)                  |
| Implantable defibrillator   | 26 / 44327          | 2.7 (1.9, 4.1)           | 2.43 (1.95-3.03)                                 | 8.42 (3.81-18.6) | 9.53 (4.41-20.6)                  |

\*Hazard ratios obtained using Cox proportional hazards models adjusted for age and sex  
<sup>†</sup>N includes all individuals without the prevalent condition at the time of CMR acquisition  
CI = confidence interval, LVMI = left ventricular mass index, LVH = left ventricular hypertrophy, Q1 = quartile 1, Q3 = quartile 3, SD = standard deviation

**Supplementary Table 14.** Associations between LVMI PRS and incident disease in European ancestry subset

| Disease                                                                                          | N events / N total <sup>†</sup> | Follow-up, yrs (Q1,Q3) | Hazard ratio for covariate (95% CI)* |                                   |                                   |
|--------------------------------------------------------------------------------------------------|---------------------------------|------------------------|--------------------------------------|-----------------------------------|-----------------------------------|
|                                                                                                  |                                 |                        | PRS (per 1 SD)                       | PRS (90 <sup>th</sup> percentile) | PRS (95 <sup>th</sup> percentile) |
| <b>UK Biobank</b>                                                                                |                                 |                        |                                      |                                   |                                   |
| Atrial fibrillation                                                                              | 22924 / 380879                  | 11.8 (11.0, 12.6)      | 1.01 (1.00-1.03)                     | 1.04 (0.99-1.08)                  | 1.05 (0.99-1.12)                  |
| Myocardial infarction                                                                            | 11773 / 377679                  | 11.8 (11.0, 12.6)      | 1.03 (1.01-1.05)                     | 1.07 (1.00-1.14)                  | 1.10 (1.02-1.20)                  |
| Heart failure                                                                                    | 12080 / 385221                  | 11.8 (11.0, 12.6)      | 1.05 (1.03-1.07)                     | 1.09 (1.03-1.15)                  | 1.12 (1.04-1.21)                  |
| Ventricular arrhythmias                                                                          | 4316 / 386754                   | 11.8 (11.0, 12.6)      | 1.07 (1.04-1.10)                     | 1.22 (1.11-1.34)                  | 1.34 (1.19-1.52)                  |
| Dilated cardiomyopathy                                                                           | 904 / 387385                    | 11.8 (11.0, 12.6)      | 1.12 (1.05-1.20)                     | 1.16 (0.96-1.43)                  | 1.45 (1.12-1.87)                  |
| Hypertrophic cardiomyopathy                                                                      | 327 / 387524                    | 11.8 (11.0, 12.6)      | 1.18 (1.06-1.32)                     | 1.41 (1.03-1.94)                  | 1.79 (1.22-2.64)                  |
| Implantable defibrillator                                                                        | 1175 / 387574                   | 11.8 (11.0, 12.6)      | 1.08 (1.02-1.14)                     | 1.24 (1.05-1.47)                  | 1.18 (0.93-1.49)                  |
| <b>Mass General Brigham</b>                                                                      |                                 |                        |                                      |                                   |                                   |
| Atrial fibrillation                                                                              | 1189 / 21096                    | 2.9 (2.0, 4.1)         | 1.04 (0.98-1.10)                     | 1.09 (0.90-1.31)                  | 1.11 (0.86-1.43)                  |
| Myocardial infarction                                                                            | 593 / 21525                     | 3.0 (2.0, 4.1)         | 0.99 (0.91-1.08)                     | 1.05 (0.81-1.37)                  | 1.10 (0.77-1.57)                  |
| Heart failure                                                                                    | 940 / 21100                     | 2.9 (2.0, 4.1)         | 0.99 (0.92-1.05)                     | 0.98 (0.79-1.22)                  | 1.02 (0.76-1.37)                  |
| Ventricular arrhythmias                                                                          | 839 / 22684                     | 3.0 (2.0, 4.2)         | 0.97 (0.91-1.04)                     | 1.11 (0.89-1.38)                  | 0.98 (0.72-1.35)                  |
| Dilated cardiomyopathy                                                                           | 401 / 2326                      | 3.0 (2.1, 4.3)         | 1.09 (0.99-1.20)                     | 1.17 (0.86-1.59)                  | 1.02 (0.66-1.59)                  |
| Hypertrophic cardiomyopathy                                                                      | 147 / 24240                     | 3.0 (2.1, 4.3)         | 1.12 (0.95-1.32)                     | 1.20 (0.72-1.99)                  | 1.24 (0.63-2.45)                  |
| Implantable defibrillator                                                                        | 125 / 24000                     | 3.0 (2.1, 4.3)         | 0.92 (0.77-1.09)                     | 0.93 (0.50-1.72)                  | 1.01 (0.45-2.30)                  |
| *Hazard ratios obtained using Cox proportional hazards models adjusted for age, sex, and PCs 1-5 |                                 |                        |                                      |                                   |                                   |
| <sup>†</sup> N includes all individuals without the prevalent condition at baseline              |                                 |                        |                                      |                                   |                                   |

**Supplementary Table 15.** Associations between LVMI PRS and incident disease using PRS derived among individuals without prevalent myocardial infarction and heart failure

| Disease                                                                                          | N events / N total <sup>†</sup> | Follow-up, yrs (Q1, Q3) | Hazard ratio for covariate (95% CI)* |                                   |                                   |
|--------------------------------------------------------------------------------------------------|---------------------------------|-------------------------|--------------------------------------|-----------------------------------|-----------------------------------|
|                                                                                                  |                                 |                         | PRS (per 1 SD)                       | PRS (90 <sup>th</sup> percentile) | PRS (95 <sup>th</sup> percentile) |
| <b>UK Biobank</b>                                                                                |                                 |                         |                                      |                                   |                                   |
| Atrial fibrillation                                                                              | 25050 / 435917                  | 11.8 (11.0, 12.6)       | 1.02 (1.01-1.03)                     | 1.03 (0.99-1.07)                  | 1.06 (1.00-1.12)                  |
| Myocardial infarction                                                                            | 13405 / 432044                  | 11.8 (11.0, 12.6)       | 1.02 (1.00-1.04)                     | 1.04 (0.98-1.10)                  | 1.03 (0.96-1.12)                  |
| Heart failure                                                                                    | 13540 / 440590                  | 11.9 (11.0, 12.6)       | 1.03 (1.02-1.05)                     | 1.08 (1.02-1.14)                  | 1.13 (1.05-1.22)                  |
| Ventricular arrhythmias                                                                          | 4882 / 442295                   | 11.9 (11.1, 12.6)       | 1.05 (1.02-1.08)                     | 1.12 (1.02-1.22)                  | 1.13 (1.00-1.28)                  |
| Dilated cardiomyopathy                                                                           | 1023 / 443013                   | 11.9 (11.1, 12.6)       | 1.08 (1.02-1.15)                     | 1.10 (0.90-1.34)                  | 1.29 (1.00-1.65)                  |
| Hypertrophic cardiomyopathy                                                                      | 420 / 443150                    | 11.9 (11.1, 12.6)       | 1.11 (1.00-1.22)                     | 1.02 (0.74-1.40)                  | 1.29 (0.87-0.92)                  |
| Implantable defibrillator                                                                        | 1444 / 443216                   | 11.9 (11.1, 12.6)       | 1.07 (1.02-1.13)                     | 1.17 (1.00-1.38)                  | 1.37 (1.11-1.68)                  |
| <b>Mass General Brigham</b>                                                                      |                                 |                         |                                      |                                   |                                   |
| Atrial fibrillation                                                                              | 1332 / 25316                    | 2.9 (2.0, 4.1)          | 1.02 (0.97-1.08)                     | 1.12 (0.95-1.33)                  | 1.13 (0.89-1.42)                  |
| Myocardial infarction                                                                            | 695 / 25592                     | 2.9 (2.0, 4.1)          | 0.96 (0.89-1.03)                     | 0.87 (0.67-1.13)                  | 0.81 (0.56-1.17)                  |
| Heart failure                                                                                    | 1074 / 25063                    | 2.9 (2.0, 4.1)          | 0.96 (0.90-1.02)                     | 1.01 (0.83-1.23)                  | 0.96 (0.73-1.26)                  |
| Ventricular arrhythmias                                                                          | 944 / 26990                     | 3.0 (2.0, 4.2)          | 0.96 (0.90-1.02)                     | 0.94 (0.75-1.16)                  | 0.85 (0.62-1.16)                  |
| Dilated cardiomyopathy                                                                           | 492 / 28821                     | 3.0 (2.1, 4.2)          | 1.08 (0.98-1.18)                     | 1.09 (0.82-1.45)                  | 1.17 (0.80-1.71)                  |
| Hypertrophic cardiomyopathy                                                                      | 183 / 28731                     | 3.0 (2.1, 4.2)          | 1.12 (0.96-1.29)                     | 1.13 (0.71-1.80)                  | 0.90 (0.44-1.83)                  |
| Implantable defibrillator                                                                        | 152 / 28454                     | 3.0 (2.1, 4.2)          | 1.06 (0.90-1.24)                     | 1.40 (0.87-2.25)                  | 2.20 (1.29-3.76)                  |
| *Hazard ratios obtained using Cox proportional hazards models adjusted for age, sex, and PCs 1-5 |                                 |                         |                                      |                                   |                                   |
| <sup>†</sup> N includes all individuals without the prevalent condition at baseline              |                                 |                         |                                      |                                   |                                   |

**Supplementary Table 16.** Two-sample Mendelian randomization for LVMI and LVM

| <b><i>Inverse-variance weighted</i></b>                                                                                                                             |                            |                           |                                             |                           |                          |                                            |
|---------------------------------------------------------------------------------------------------------------------------------------------------------------------|----------------------------|---------------------------|---------------------------------------------|---------------------------|--------------------------|--------------------------------------------|
| <b>Phenotype</b>                                                                                                                                                    | <b>LVMI Beta (95% CI)*</b> | <b>LVMI p<sup>†</sup></b> | <b>LVM Beta (95% CI)*</b>                   | <b>LVM p<sup>†</sup></b>  |                          |                                            |
| Systolic blood pressure                                                                                                                                             | 0.27 (0.23-0.31)           | 1.75x10 <sup>-41</sup>    | 0.44 (0.35-0.53)                            | 8.16x10 <sup>-23</sup>    |                          |                                            |
| Diastolic blood pressure                                                                                                                                            | 0.32 (0.25-0.39)           | 1.64x10 <sup>-20</sup>    | 0.54 (0.39-0.69)                            | 1.74x10 <sup>-12</sup>    |                          |                                            |
| Diabetes                                                                                                                                                            | 0.31 (0.05-0.56)           | 0.018                     | 0.62 (0.004-1.23)                           | 0.048                     |                          |                                            |
| <b><i>Weighted median</i></b>                                                                                                                                       |                            |                           |                                             |                           |                          |                                            |
| <b>Phenotype</b>                                                                                                                                                    | <b>LVMI Beta (95% CI)*</b> | <b>LVMI p<sup>†</sup></b> | <b>LVM Beta (95% CI)*</b>                   | <b>LVM p<sup>†</sup></b>  |                          |                                            |
| Systolic blood pressure                                                                                                                                             | 0.28 (0.23-0.33)           | 6.65x10 <sup>-28</sup>    | 0.49 (0.37-0.60)                            | 1.93x10 <sup>-17</sup>    |                          |                                            |
| Diastolic blood pressure                                                                                                                                            | 0.33 (0.25-0.42)           | 3.03x10 <sup>-14</sup>    | 0.59 (0.40-0.78)                            | 7.82x10 <sup>-10</sup>    |                          |                                            |
| Diabetes                                                                                                                                                            | 0.19 (-0.15-0.53)          | 0.26                      | 0.02 (-0.73-0.77)                           | 0.96                      |                          |                                            |
| <b><i>MR-Egger</i></b>                                                                                                                                              |                            |                           |                                             |                           |                          |                                            |
| <b>Phenotype</b>                                                                                                                                                    | <b>LVMI Beta (95% CI)*</b> | <b>LVMI p<sup>†</sup></b> | <b>LVMI Intercept (p-value)<sup>‡</sup></b> | <b>LVM Beta (95% CI)*</b> | <b>LVM p<sup>†</sup></b> | <b>LVM Intercept (p-value)<sup>‡</sup></b> |
| Systolic blood pressure                                                                                                                                             | 0.24 (0.16-0.31)           | 3.23x10 <sup>-10</sup>    | 0.01 (0.38)                                 | 0.38 (0.21-0.55)          | 1.07x10 <sup>-5</sup>    | 0.02 (0.40)                                |
| Diastolic blood pressure                                                                                                                                            | 0.42 (0.30-0.54)           | 1.56x10 <sup>-12</sup>    | -0.02 (0.04)                                | 0.76 (0.51-1.02)          | 6.87x10 <sup>-9</sup>    | -0.03 (0.04)                               |
| Diabetes                                                                                                                                                            | 0.15 (-0.36-0.66)          | 0.56                      | 0.01 (0.50)                                 | -0.33 (-1.56-0.89)        | 0.59                     | 0.06 (0.08)                                |
| *Beta estimates represent the expected causal effect per 1-standard deviation increase in the respective risk factor (phenotype) on LVMI and LVM, respectively      |                            |                           |                                             |                           |                          |                                            |
| †Denotes two-sided p-value corresponding to the beta estimate from the respective regression model                                                                  |                            |                           |                                             |                           |                          |                                            |
| ‡A non-zero intercept suggests the presence of directional pleiotropy, where the two-sided p-value <0.05 indicates a statistically significant difference from zero |                            |                           |                                             |                           |                          |                                            |

**Supplementary Table 17.** List of HCM and DCM rare variants

| Chr | Position (hg 38) | Reference Allele | Alternative Allele | Disease | Class                        | Gene   |
|-----|------------------|------------------|--------------------|---------|------------------------------|--------|
| 1   | 201365291        | C                | A                  | HCM     | pathogenic/likely pathogenic | TNNT2  |
| 1   | 236731315        | G                | A                  | HCM     | loss-of-function             | ACTN2  |
| 1   | 53210561         | G                | A                  | HCM     | missense                     | CPT2   |
| 1   | 53210561         | G                | A                  | HCM     | pathogenic/likely pathogenic | CPT2   |
| 1   | 99916398         | A                | G                  | HCM     | pathogenic/likely pathogenic | AGL    |
| 2   | 219418497        | C                | T                  | HCM     | pathogenic/likely pathogenic | DES    |
| 6   | 118558982        | C                | CCT                | HCM     | loss-of-function             | PLN    |
| 7   | 128852972        | G                | A                  | HCM     | missense                     | FLNC   |
| 11  | 47332832         | C                | CG                 | HCM     | loss-of-function             | MYBPC3 |
| 11  | 47335081         | CAG              | C                  | HCM     | loss-of-function             | MYBPC3 |
| 11  | 47335081         | CAG              | C                  | HCM     | pathogenic/likely pathogenic | MYBPC3 |
| 11  | 47337729         | A                | AC                 | HCM     | pathogenic/likely pathogenic | MYBPC3 |
| 11  | 47337729         | A                | AC                 | HCM     | loss-of-function             | MYBPC3 |
| 11  | 47339375         | TG               | T                  | HCM     | loss-of-function             | MYBPC3 |
| 11  | 47339375         | TG               | T                  | HCM     | pathogenic/likely pathogenic | MYBPC3 |
| 11  | 47342574         | T                | A                  | HCM     | pathogenic/likely pathogenic | MYBPC3 |
| 11  | 47343069         | G                | A                  | HCM     | loss-of-function             | MYBPC3 |
| 11  | 47343069         | G                | A                  | HCM     | pathogenic/likely pathogenic | MYBPC3 |
| 11  | 47343314         | C                | T                  | HCM     | pathogenic/likely pathogenic | MYBPC3 |
| 11  | 47346379         | C                | T                  | HCM     | pathogenic/likely pathogenic | MYBPC3 |
| 11  | 47348541         | C                | G                  | HCM     | pathogenic/likely pathogenic | MYBPC3 |
| 11  | 47352622         | C                | T                  | HCM     | loss-of-function             | MYBPC3 |
| 14  | 23415651         | C                | T                  | HCM     | pathogenic/likely pathogenic | MYH7   |
| 14  | 23422267         | C                | T                  | HCM     | missense                     | MYH7   |
| 14  | 23422267         | C                | T                  | HCM     | pathogenic/likely pathogenic | MYH7   |
| 14  | 23424107         | G                | C                  | HCM     | pathogenic/likely pathogenic | MYH7   |
| 14  | 23424839         | C                | T                  | HCM     | pathogenic/likely pathogenic | MYH7   |
| 14  | 23424909         | T                | C                  | HCM     | pathogenic/likely pathogenic | MYH7   |
| 14  | 23429850         | C                | T                  | HCM     | pathogenic/likely pathogenic | MYH7   |
| 15  | 84840481         | AG               | A                  | HCM     | loss-of-function             | ALPK3  |
| 15  | 84862655         | AC               | A                  | HCM     | loss-of-function             | ALPK3  |
| 15  | 84862795         | C                | G                  | HCM     | loss-of-function             | ALPK3  |
| 17  | 80117016         | G                | C                  | HCM     | pathogenic/likely pathogenic | GAA    |
| 18  | 31592974         | G                | A                  | HCM     | pathogenic/likely pathogenic | TTR    |

|    |           |       |       |     |                              |        |
|----|-----------|-------|-------|-----|------------------------------|--------|
| 19 | 55154095  | G     | A     | HCM | pathogenic/likely pathogenic | TNNI3  |
| 1  | 74489223  | T     | TA    | DCM | loss-of-function             | TNNI3K |
| 2  | 178532133 | C     | A     | DCM | loss-of-function             | TTN    |
| 2  | 178532844 | G     | A     | DCM | pathogenic/likely pathogenic | TTN    |
| 2  | 178532844 | G     | A     | DCM | loss-of-function             | TTN    |
| 2  | 178533652 | G     | GTTGA | DCM | loss-of-function             | TTN    |
| 2  | 178537725 | ATT   | A     | DCM | loss-of-function             | TTN    |
| 2  | 178539559 | G     | A     | DCM | pathogenic/likely pathogenic | TTN    |
| 2  | 178539559 | G     | A     | DCM | loss-of-function             | TTN    |
| 2  | 178542492 | C     | A     | DCM | loss-of-function             | TTN    |
| 2  | 178543853 | T     | TG    | DCM | loss-of-function             | TTN    |
| 2  | 178545817 | TACTG | T     | DCM | pathogenic/likely pathogenic | TTN    |
| 2  | 178545817 | TACTG | T     | DCM | loss-of-function             | TTN    |
| 2  | 178552221 | T     | A     | DCM | loss-of-function             | TTN    |
| 2  | 178552996 | ATAAT | A     | DCM | pathogenic/likely pathogenic | TTN    |
| 2  | 178552996 | ATAAT | A     | DCM | loss-of-function             | TTN    |
| 2  | 178553039 | C     | T     | DCM | loss-of-function             | TTN    |
| 2  | 178553039 | C     | T     | DCM | pathogenic/likely pathogenic | TTN    |
| 2  | 178554149 | C     | T     | DCM | loss-of-function             | TTN    |
| 2  | 178554619 | TG    | T     | DCM | loss-of-function             | TTN    |
| 2  | 178559385 | TAATA | T     | DCM | loss-of-function             | TTN    |
| 2  | 178562716 | G     | A     | DCM | loss-of-function             | TTN    |
| 2  | 178562716 | G     | A     | DCM | pathogenic/likely pathogenic | TTN    |
| 2  | 178562889 | A     | C     | DCM | loss-of-function             | TTN    |
| 2  | 178569478 | G     | A     | DCM | pathogenic/likely pathogenic | TTN    |
| 2  | 178569478 | G     | A     | DCM | loss-of-function             | TTN    |
| 2  | 178572193 | G     | A     | DCM | loss-of-function             | TTN    |
| 2  | 178582434 | CAG   | C     | DCM | loss-of-function             | TTN    |
| 2  | 178584726 | G     | A     | DCM | loss-of-function             | TTN    |
| 2  | 178584726 | G     | A     | DCM | pathogenic/likely pathogenic | TTN    |
| 2  | 178592401 | GAC   | G     | DCM | loss-of-function             | TTN    |
| 2  | 178592602 | AC    | A     | DCM | loss-of-function             | TTN    |
| 2  | 178592602 | AC    | A     | DCM | pathogenic/likely pathogenic | TTN    |
| 2  | 178592916 | CAG   | C     | DCM | pathogenic/likely pathogenic | TTN    |
| 2  | 178592916 | CAG   | C     | DCM | loss-of-function             | TTN    |
| 2  | 178599242 | CT    | C     | DCM | loss-of-function             | TTN    |
| 2  | 178609960 | CTACA | C     | DCM | pathogenic/likely pathogenic | TTN    |

|    |           |        |     |     |                              |       |
|----|-----------|--------|-----|-----|------------------------------|-------|
| 2  | 178609960 | CTACA  | C   | DCM | loss-of-function             | TTN   |
| 2  | 178613006 | C      | T   | DCM | loss-of-function             | TTN   |
| 2  | 178619714 | G      | A   | DCM | loss-of-function             | TTN   |
| 2  | 178621474 | C      | A   | DCM | loss-of-function             | TTN   |
| 2  | 178630923 | G      | A   | DCM | loss-of-function             | TTN   |
| 2  | 178680253 | C      | T   | DCM | loss-of-function             | TTN   |
| 2  | 178689897 | C      | T   | DCM | loss-of-function             | TTN   |
| 2  | 178758982 | A      | G   | DCM | loss-of-function             | TTN   |
| 2  | 178759017 | G      | A   | DCM | loss-of-function             | TTN   |
| 2  | 178799623 | T      | A   | DCM | loss-of-function             | TTN   |
| 2  | 219418497 | C      | T   | DCM | pathogenic/likely pathogenic | DES   |
| 2  | 73454058  | C      | T   | DCM | pathogenic/likely pathogenic | ALMS1 |
| 2  | 73572648  | AC     | A   | DCM | loss-of-function             | ALMS1 |
| 2  | 73572648  | AC     | A   | DCM | pathogenic/likely pathogenic | ALMS1 |
| 2  | 73573323  | C      | T   | DCM | pathogenic/likely pathogenic | ALMS1 |
| 2  | 73573323  | C      | T   | DCM | loss-of-function             | ALMS1 |
| 3  | 136301086 | A      | G   | DCM | missense                     | PCCB  |
| 3  | 136327173 | G      | GTA | DCM | loss-of-function             | PCCB  |
| 3  | 136327175 | G      | A   | DCM | missense                     | PCCB  |
| 3  | 136327178 | AT     | A   | DCM | loss-of-function             | PCCB  |
| 3  | 136327178 | AT     | A   | DCM | pathogenic/likely pathogenic | PCCB  |
| 3  | 38566533  | A      | G   | DCM | missense                     | SCN5A |
| 3  | 38586037  | C      | T   | DCM | missense                     | SCN5A |
| 5  | 240459    | C      | T   | DCM | loss-of-function             | SDHA  |
| 5  | 240459    | C      | T   | DCM | pathogenic/likely pathogenic | SDHA  |
| 6  | 7579995   | C      | T   | DCM | loss-of-function             | DSP   |
| 6  | 7579995   | C      | T   | DCM | pathogenic/likely pathogenic | DSP   |
| 6  | 7580118   | A      | T   | DCM | loss-of-function             | DSP   |
| 6  | 7580609   | CA     | C   | DCM | loss-of-function             | DSP   |
| 6  | 7580609   | CA     | C   | DCM | pathogenic/likely pathogenic | DSP   |
| 6  | 7580872   | ACT    | A   | DCM | loss-of-function             | DSP   |
| 6  | 7584825   | TAGAA  | T   | DCM | pathogenic/likely pathogenic | DSP   |
| 6  | 7584825   | TAGAA  | T   | DCM | loss-of-function             | DSP   |
| 6  | 7585228   | TGCACA | T   | DCM | loss-of-function             | DSP   |
| 9  | 105635257 | T      | TA  | DCM | loss-of-function             | FKTN  |
| 10 | 110780967 | CT     | C   | DCM | loss-of-function             | RBM20 |
| 10 | 110831058 | CA     | C   | DCM | loss-of-function             | RBM20 |



|                                                                                                                                                                                                                                      |           |        |    |     |                              |       |
|--------------------------------------------------------------------------------------------------------------------------------------------------------------------------------------------------------------------------------------|-----------|--------|----|-----|------------------------------|-------|
| 10                                                                                                                                                                                                                                   | 119676479 | C      | T  | DCM | loss-of-function             | BAG3  |
| 10                                                                                                                                                                                                                                   | 119676479 | C      | T  | DCM | pathogenic/likely pathogenic | BAG3  |
| 10                                                                                                                                                                                                                                   | 74118141  | G      | A  | DCM | loss-of-function             | VCL   |
| 11                                                                                                                                                                                                                                   | 19182747  | CTG    | C  | DCM | loss-of-function             | CSRP3 |
| 12                                                                                                                                                                                                                                   | 21805251  | C      | CA | DCM | loss-of-function             | ABCC9 |
| 12                                                                                                                                                                                                                                   | 21805253  | A      | T  | DCM | loss-of-function             | ABCC9 |
| 12                                                                                                                                                                                                                                   | 21805308  | G      | A  | DCM | missense                     | ABCC9 |
| 12                                                                                                                                                                                                                                   | 32802499  | GGGTGT | G  | DCM | loss-of-function             | PKP2  |
| 14                                                                                                                                                                                                                                   | 23422178  | A      | C  | DCM | loss-of-function             | MYH7  |
| Variants listed comprise high confidence loss-of-function, deleterious missense, and known pathogenic or likely pathogenic variants in HCM and DCM genes as catalogued in ClinVar as of 2/9/2021 (see <b>Supplementary Methods</b> ) |           |        |    |     |                              |       |

Supplementary Figure 1. Quantile-quantile plot of LVMI and LVM GWAS

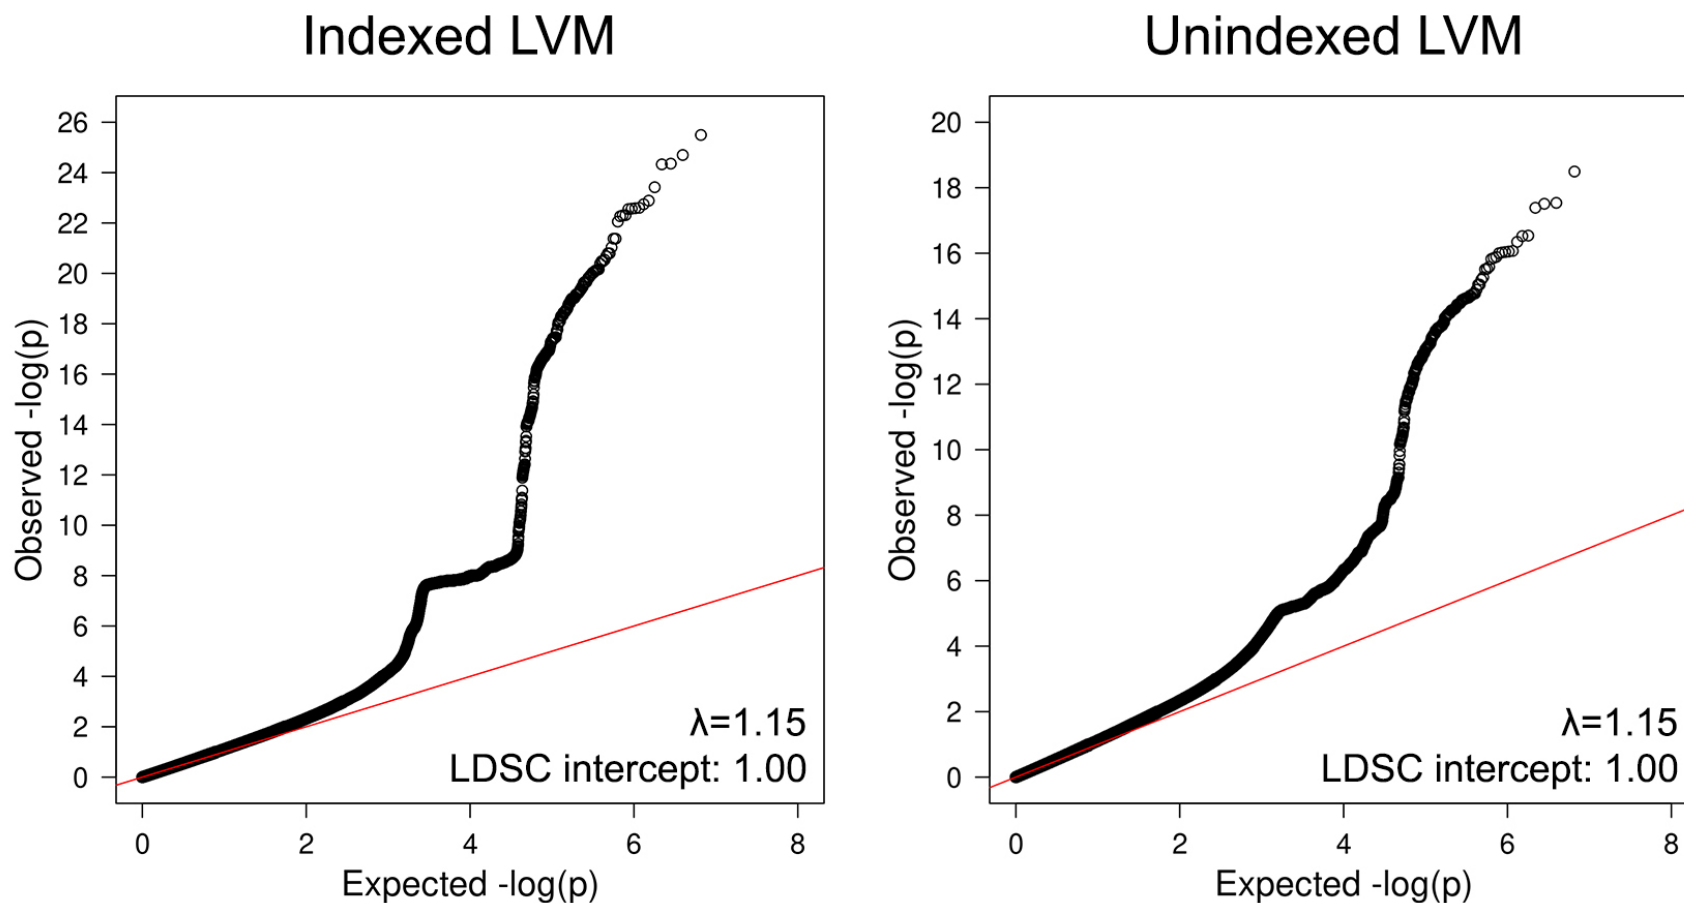

Depicted are quantile-quantile plots for the primary mixed-ancestry LVMI GWAS (left) and the unindexed LVM GWAS (right). The genomic control factor  $\lambda$  is depicted on the bottom right of each plot, as is the linkage disequilibrium score regression intercept, where a value close of one suggests the absence of inflation (and where an elevated  $\lambda$  is instead attributable to polygenicity).<sup>33</sup> Points denote two-sided p-values corresponding to the BOLT-LMM  $\chi^2$  statistic.

Supplementary Figure 2. Regional association plots for genome-wide significant loci

rs143800963

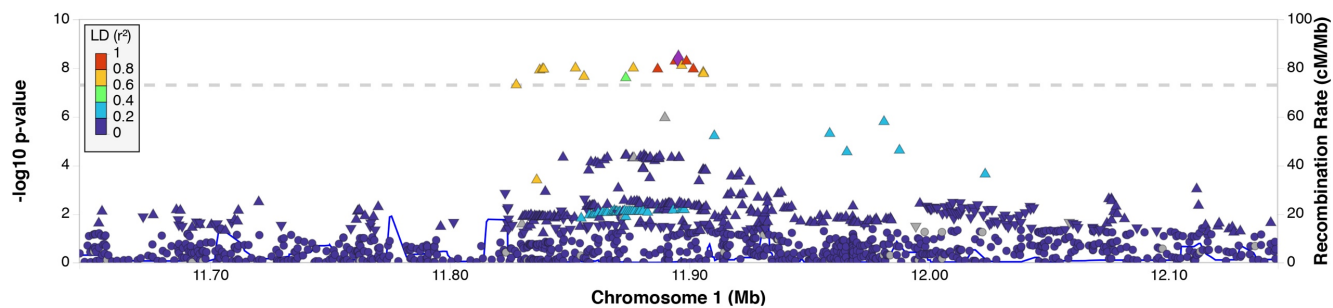

GWAS Catalog hits for v20\_lvmi

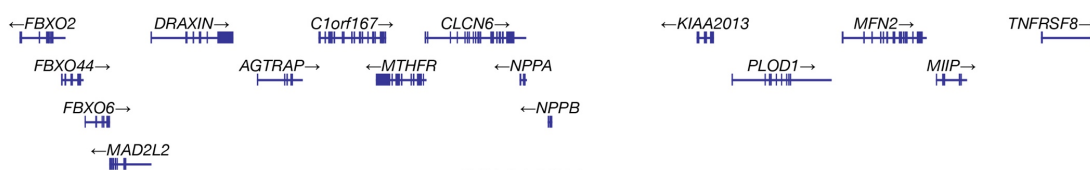

rs2255167

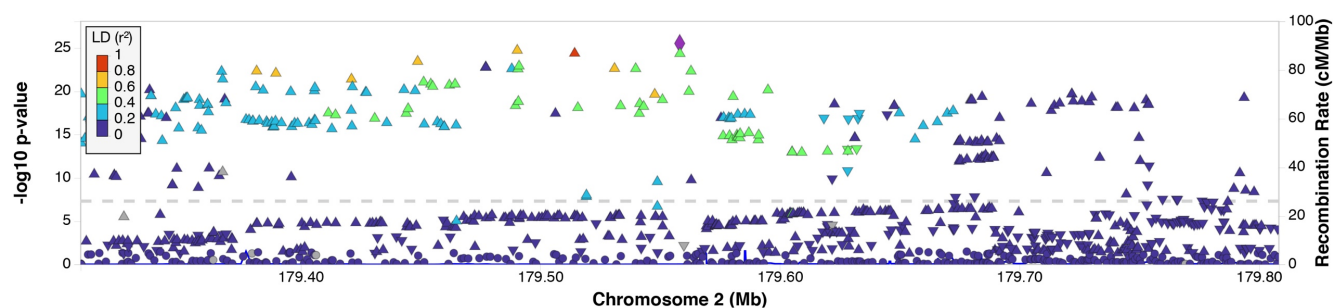

GWAS Catalog hits for v20\_lvmi

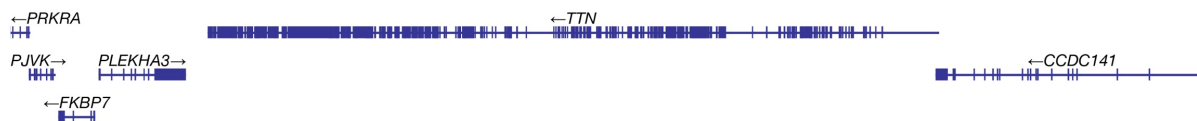

rs10497529

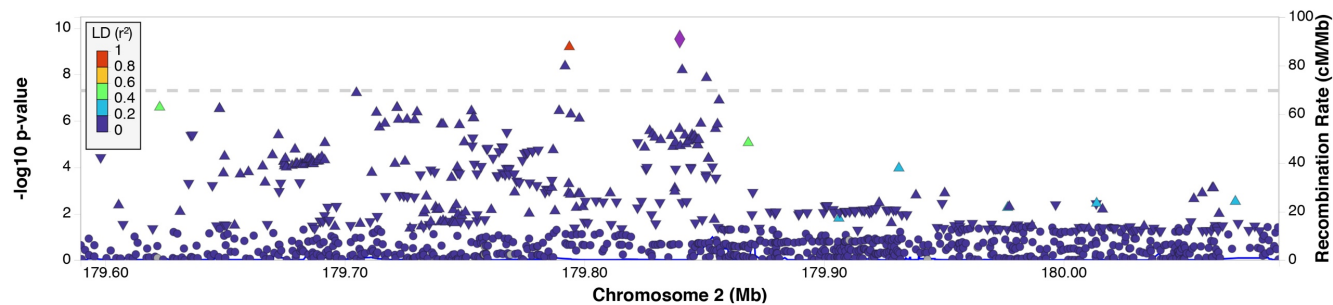

GWAS Catalog hits for v25\_seg\_conditional

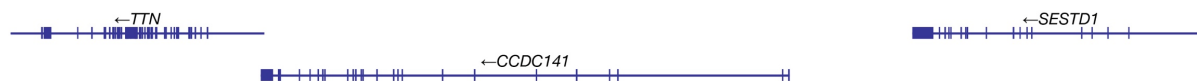

132402428:CTT\_C

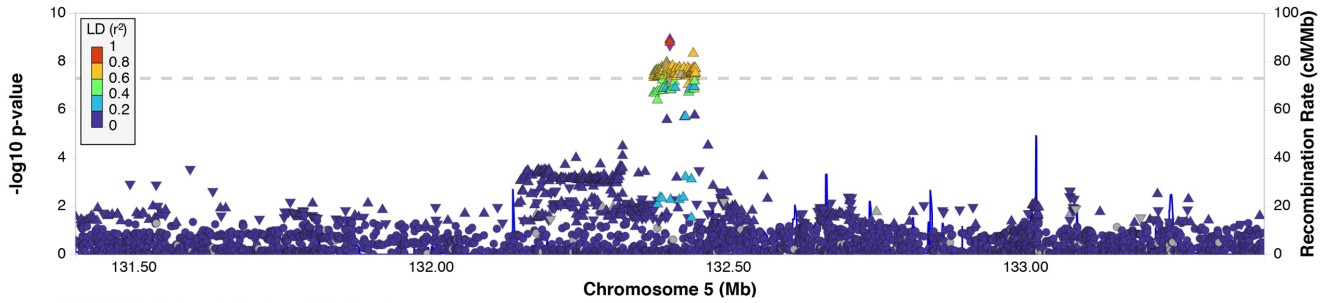

GWAS Catalog hits for v20\_lvmi

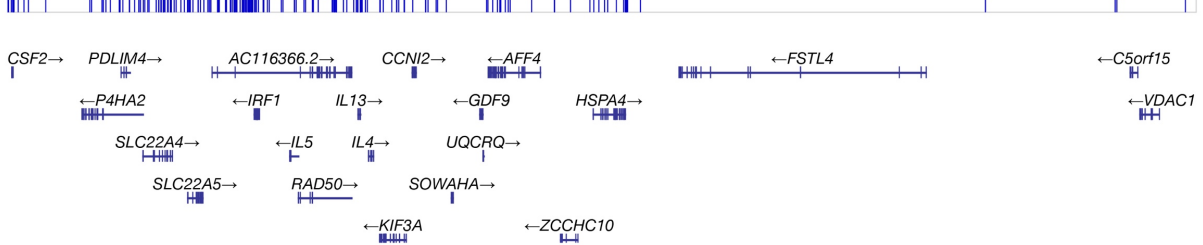

rs9388498

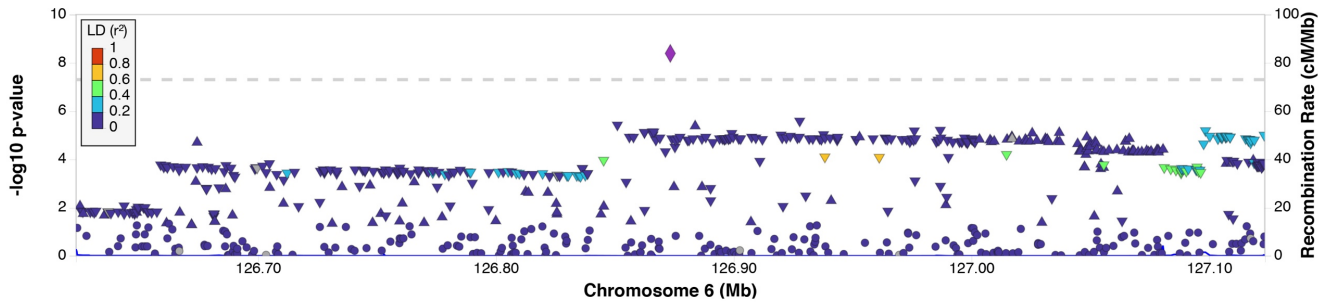

GWAS Catalog hits for v20\_lvmi

CENPW

rs34163229

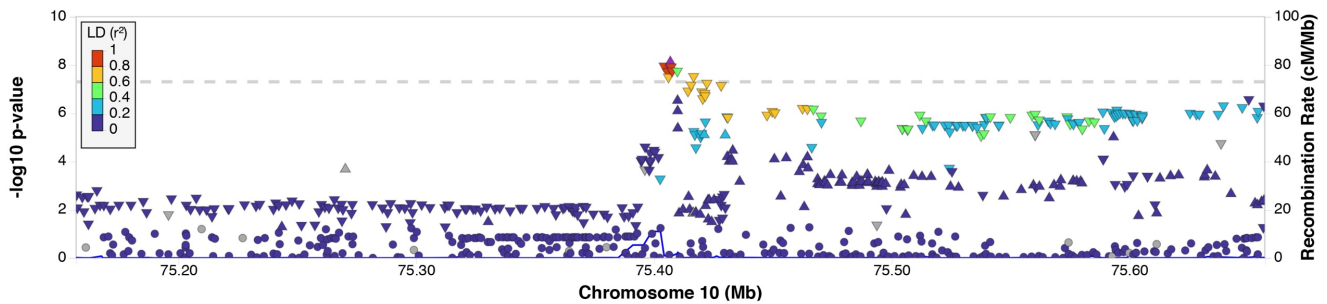

GWAS Catalog hits for v20\_lvmi

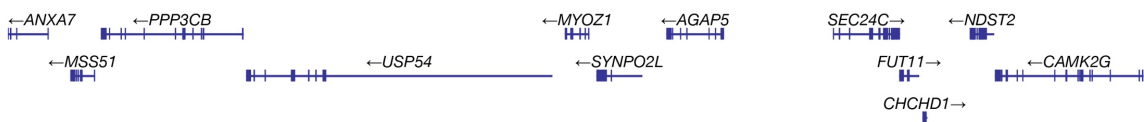

rs34163229

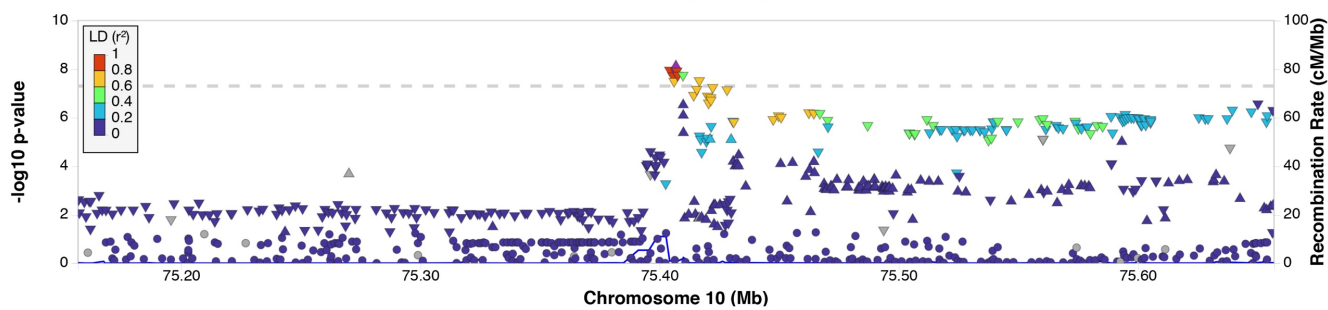

GWAS Catalog hits for v20\_lvmi

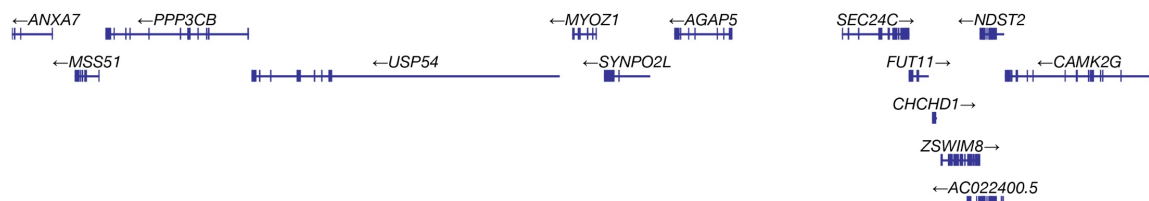

rs3729989

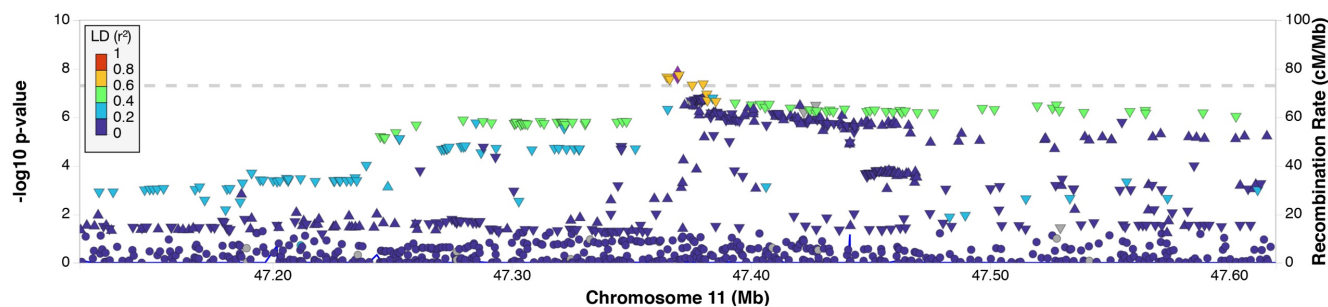

GWAS Catalog hits for v20\_lvmi

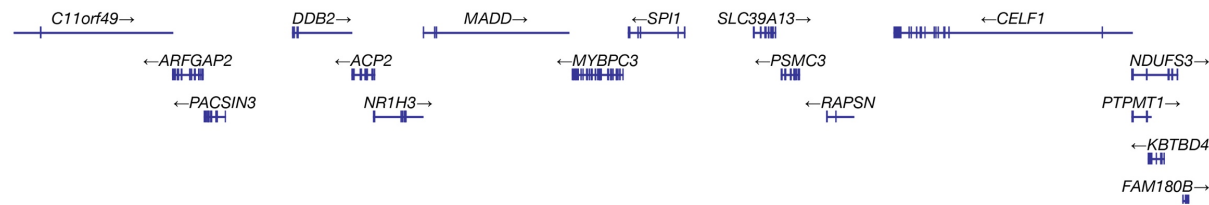

rs28552516

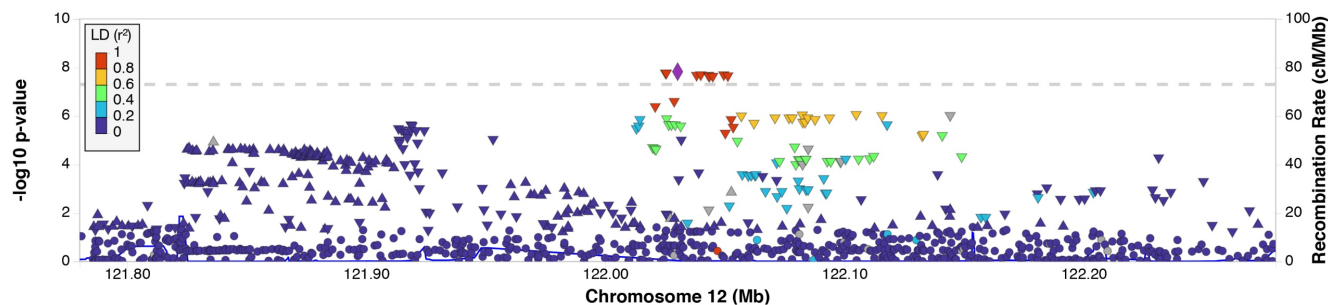

GWAS Catalog hits for v20\_lvmi

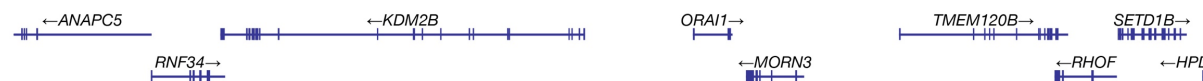

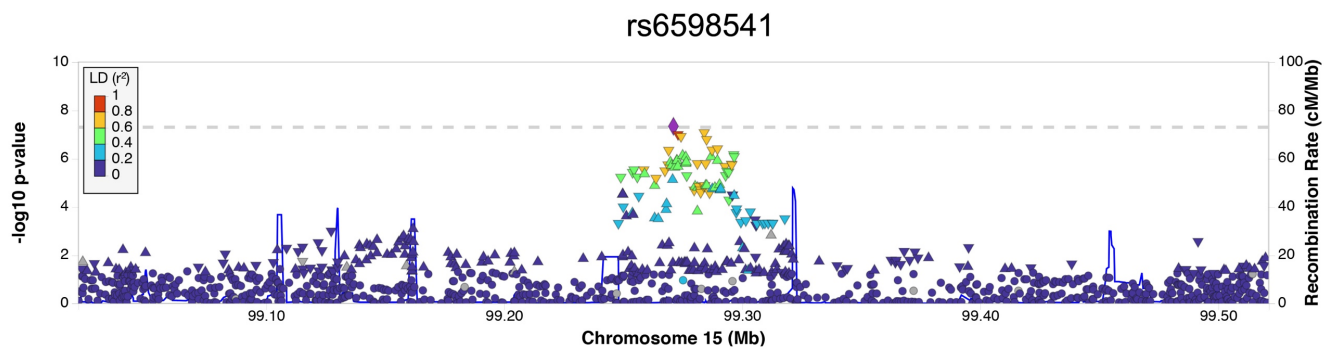

GWAS Catalog hits for v20\_lvmi

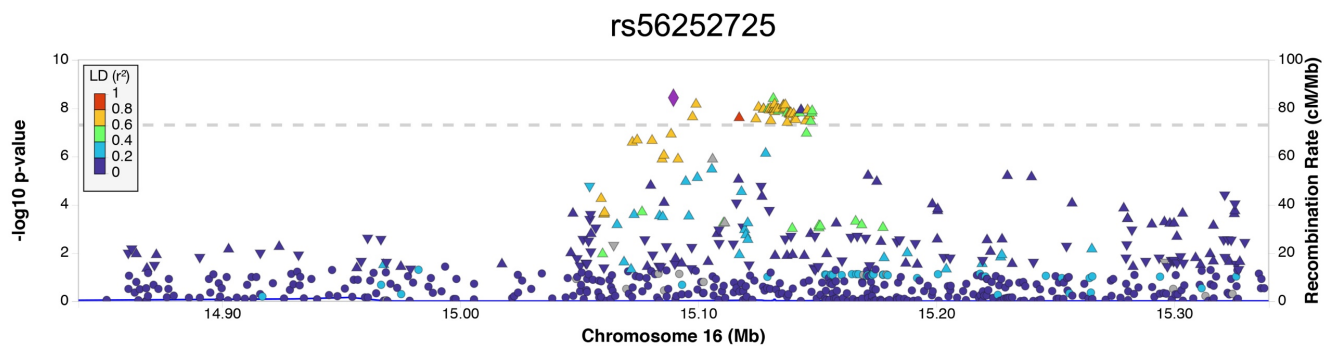

GWAS Catalog hits for v20\_lvmi

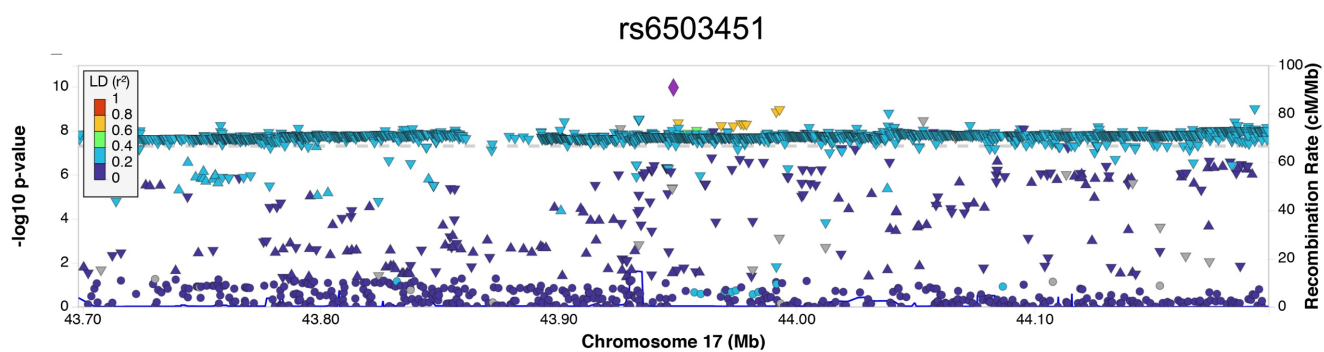

GWAS Catalog hits for v20\_lvmi

rs199501

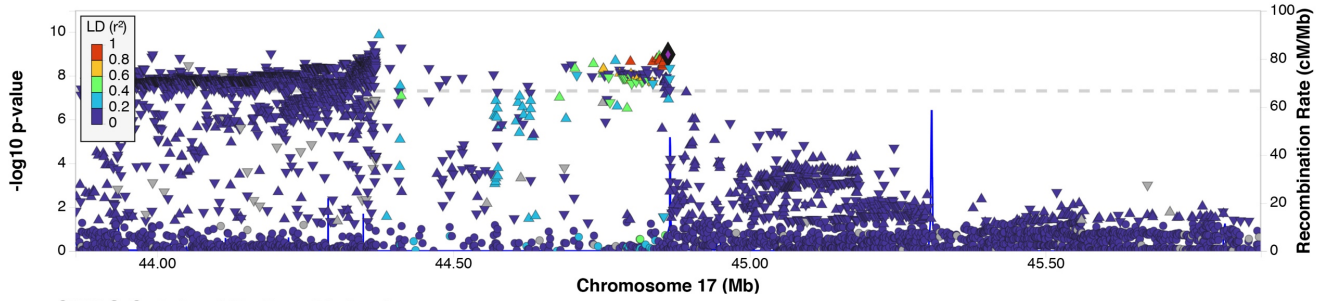

GWAS Catalog hits for v20\_lvmi

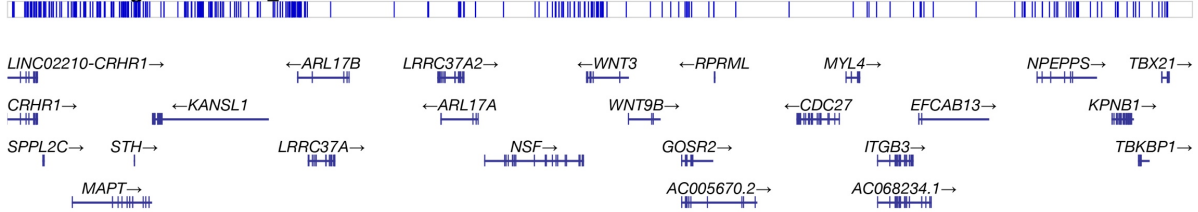

rs62621197

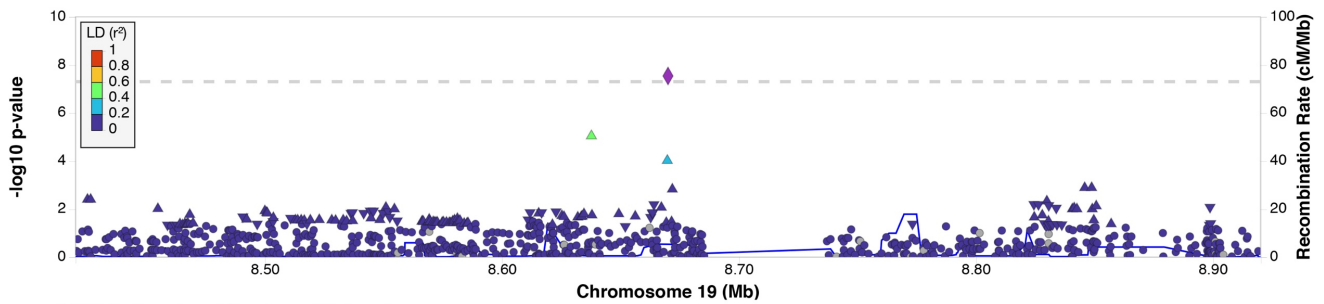

GWAS Catalog hits for v20\_lvmi

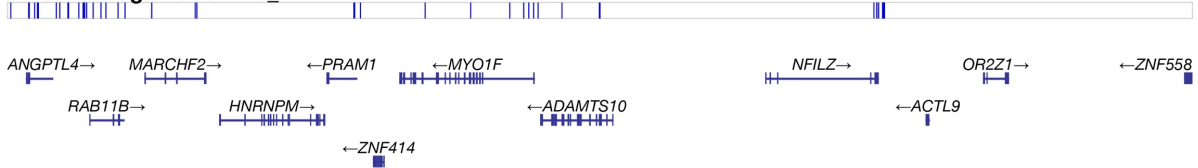

rs143973349 (EUR only)

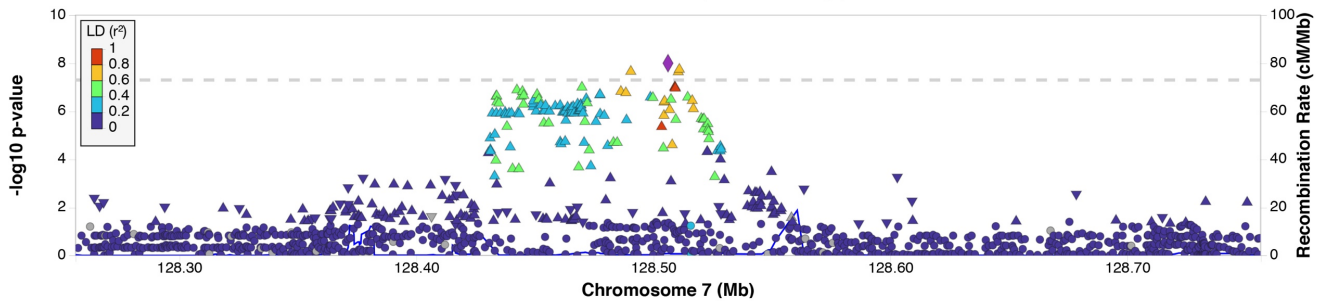

GWAS Catalog hits for v23\_lvmi\_seg\_eur

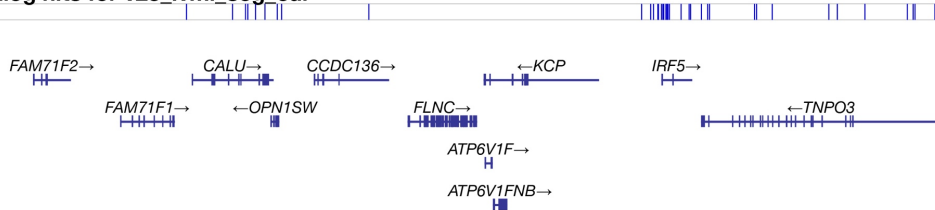

rs142032045 (EUR only)

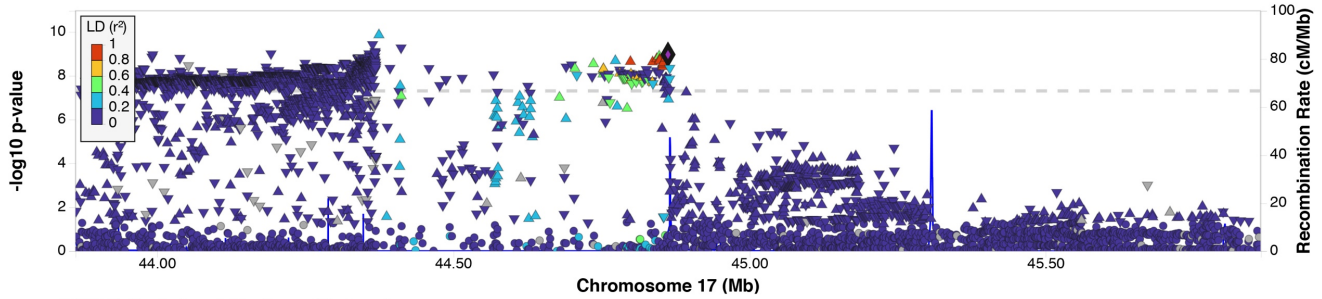

GWAS Catalog hits for v20\_lvmi

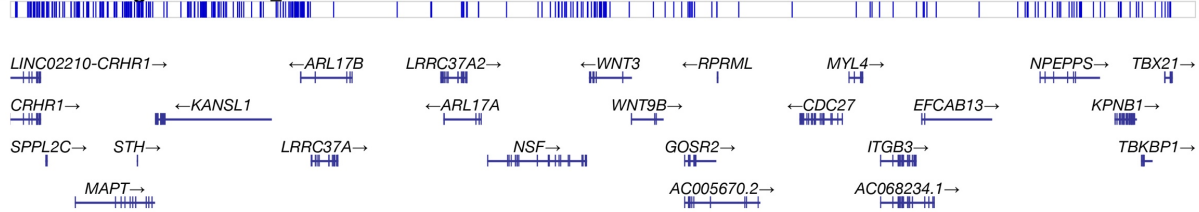

For each plot, the lead single-nucleotide polymorphism (SNP) is depicted by the purple diamond and labeled above each plot. Adjacent SNPs are depicted as circles, with the degree of linkage disequilibrium with the sentinel SNP shown by color (see legend). Linkage disequilibrium information is obtained using the All Populations 1,000G reference panel for the primary analysis variants, and the European 1,000G reference panel for the European-only variants. Genes in the region and their locations are shown at the bottom of each plot. The y-axis plots the negative  $\log_{10}$  of the two-sided p-value corresponding to BOLT-LMM  $\chi^2$  statistic. The hashed horizontal line denotes genome-wide significance ( $p < 5 \times 10^{-8}$ ).



### Supplementary Figure 3. Manhattan plot of unindexed LV mass GWAS

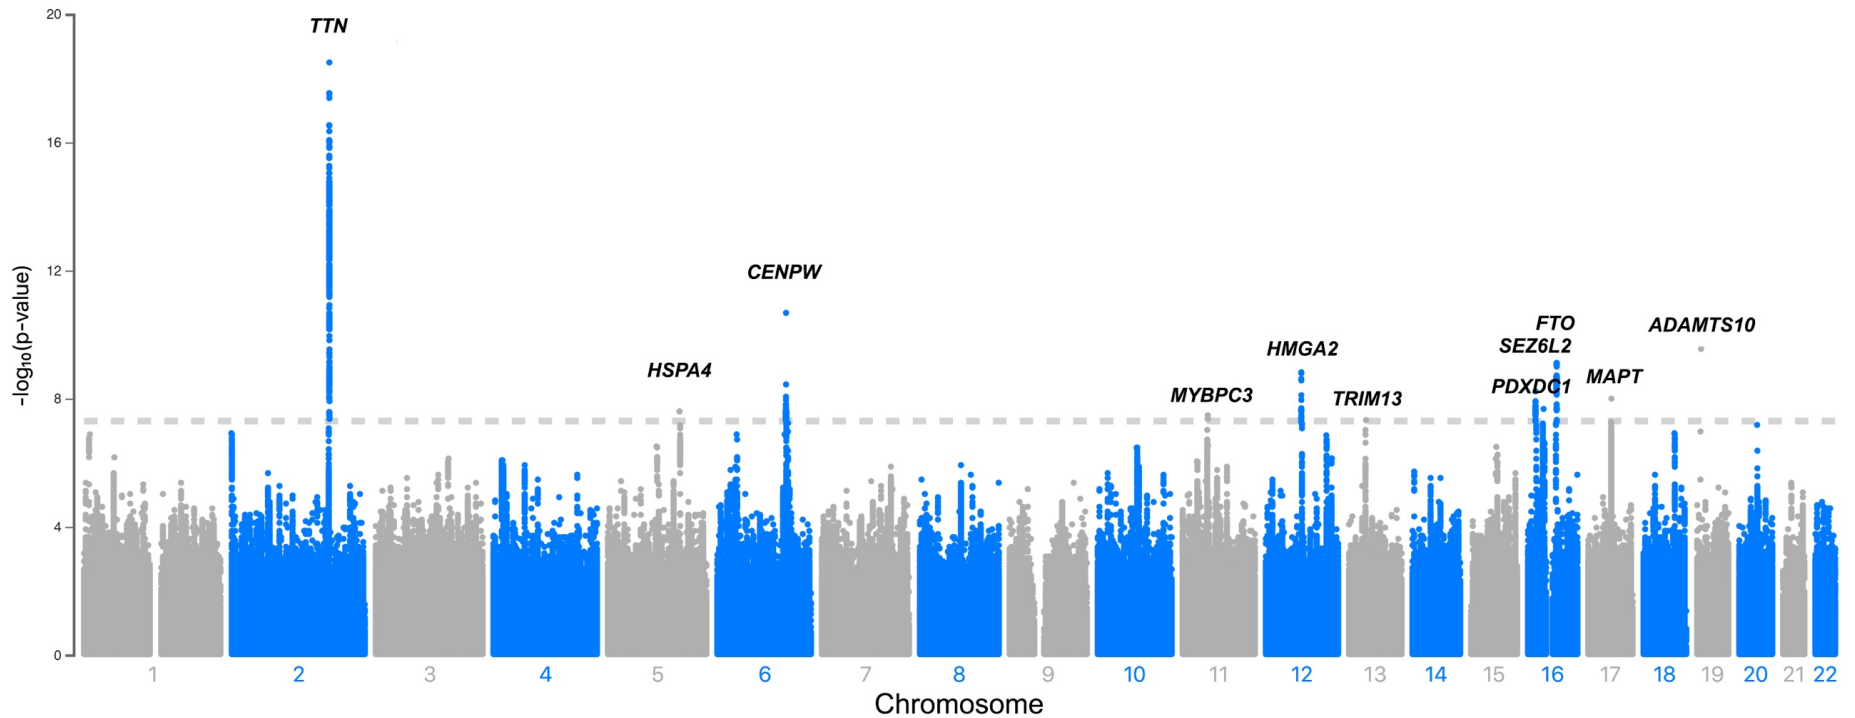

Depicted across increasing chromosome (x-axis) are the results of the European ancestry subset GWAS of left ventricular mass index. The y-axis plots the negative  $\log_{10}$  of the two-sided p-value corresponding to BOLT-LMM  $\chi^2$  statistic. Variants meeting the standard multiplicity correction for genome-wide significance ( $p < 5 \times 10^{-8}$ , depicted by hashed horizontal line), are labeled by the closest gene to the lead variant.

Supplementary Figure 4. Quantile-quantile plot of LVMI GWAS for European-ancestry

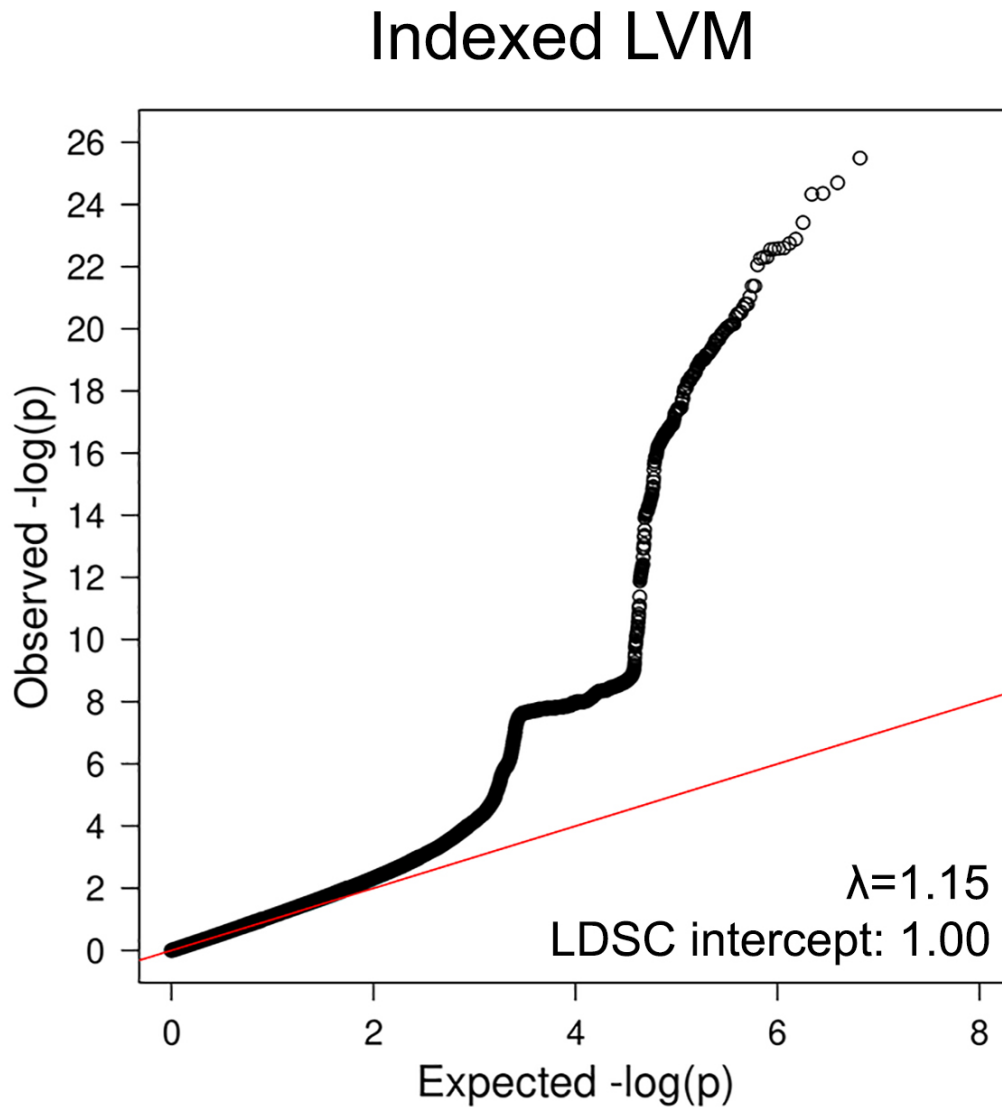

sample

Points denote two-sided p-values corresponding to the BOLT-LMM  $\chi^2$  statistic. The lambda genetic control factor was 1.15. Linkage disequilibrium score regression analysis<sup>33</sup> revealed an intercept of 1.00, suggesting that the elevated lambda value was attributable to polygenicity rather than inflation.

### Supplementary Figure 5. Manhattan plot of European-ancestry GWAS

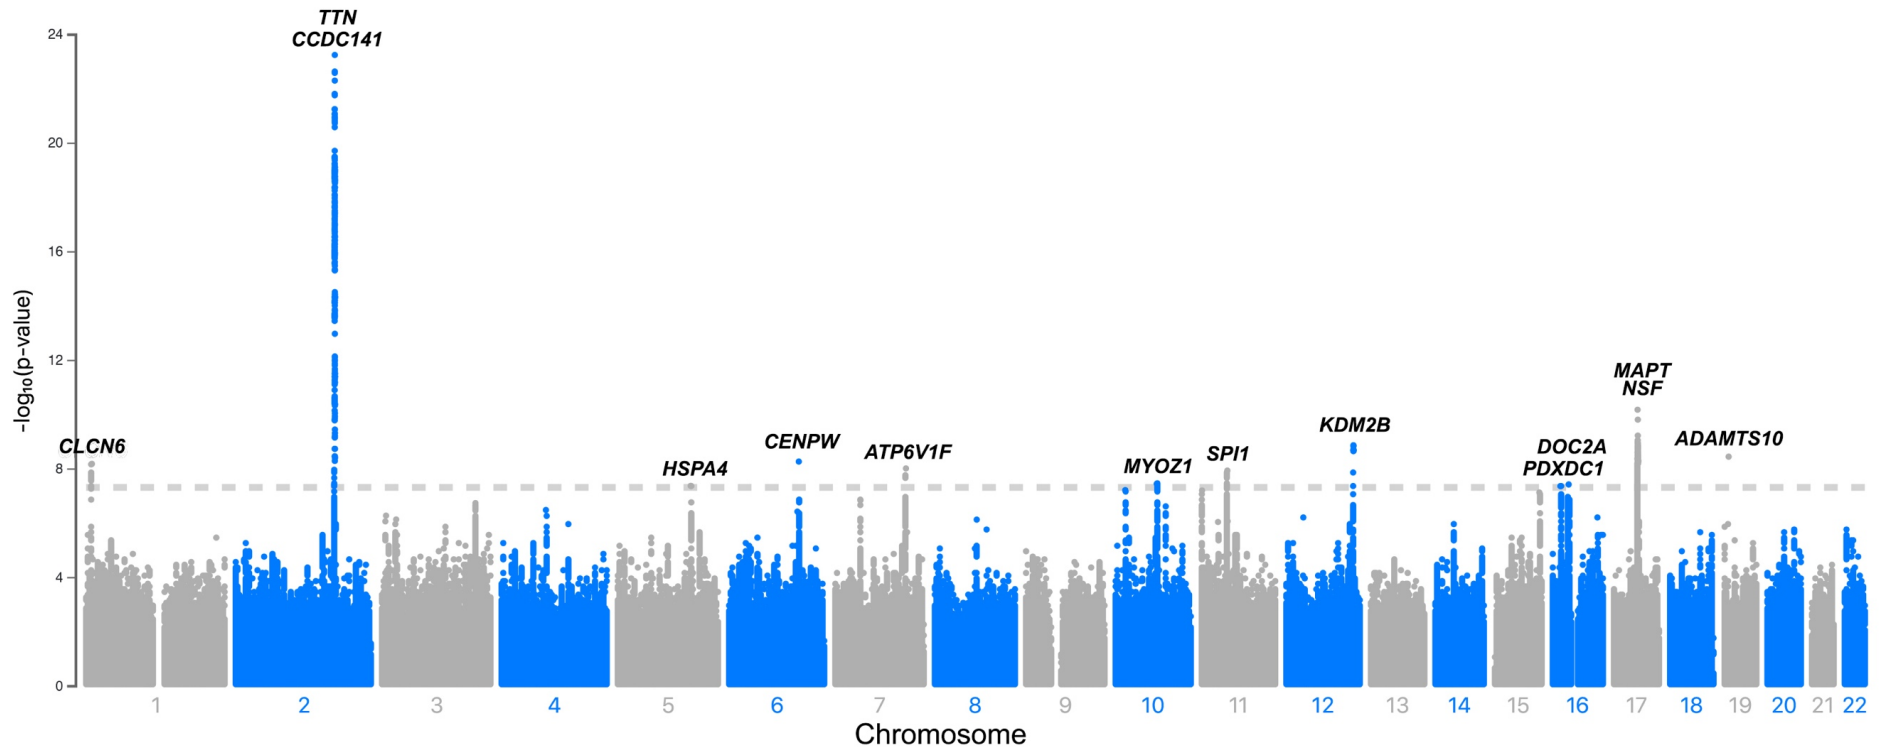

Depicted across increasing chromosome (x-axis) are the results of the European ancestry subset GWAS of left ventricular mass index. The y-axis plots the negative  $\log_{10}$  of the two-sided p-value corresponding to BOLT-LMM  $\chi^2$  statistic. Variants meeting the standard multiplicity correction for genome-wide significance ( $p < 5 \times 10^{-8}$ , depicted by hashed horizontal line), are labeled by the closest gene to the lead variant.

## Supplementary Figure 6. Two-sample Mendelian randomization plots

### Left ventricular mass index

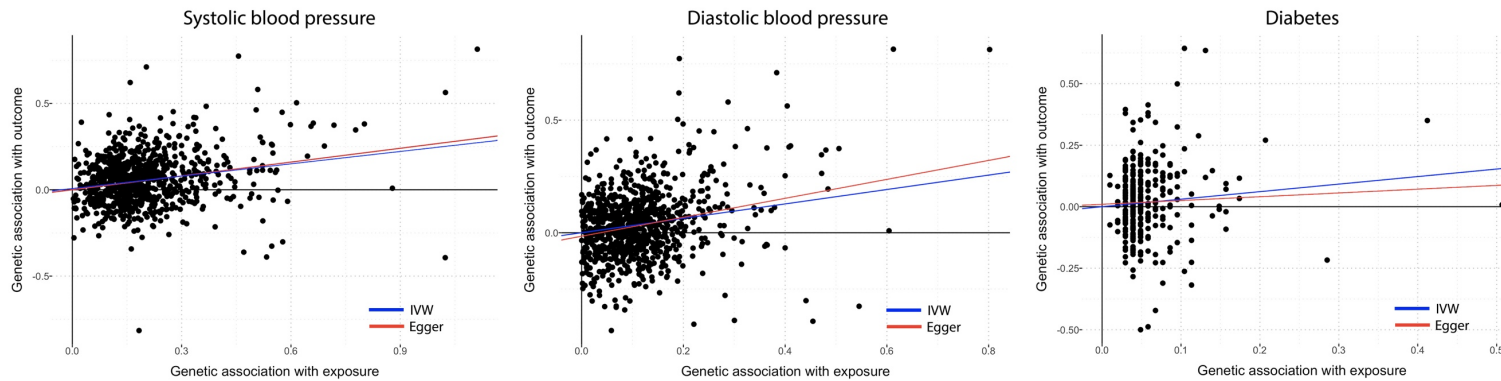

### Left ventricular mass

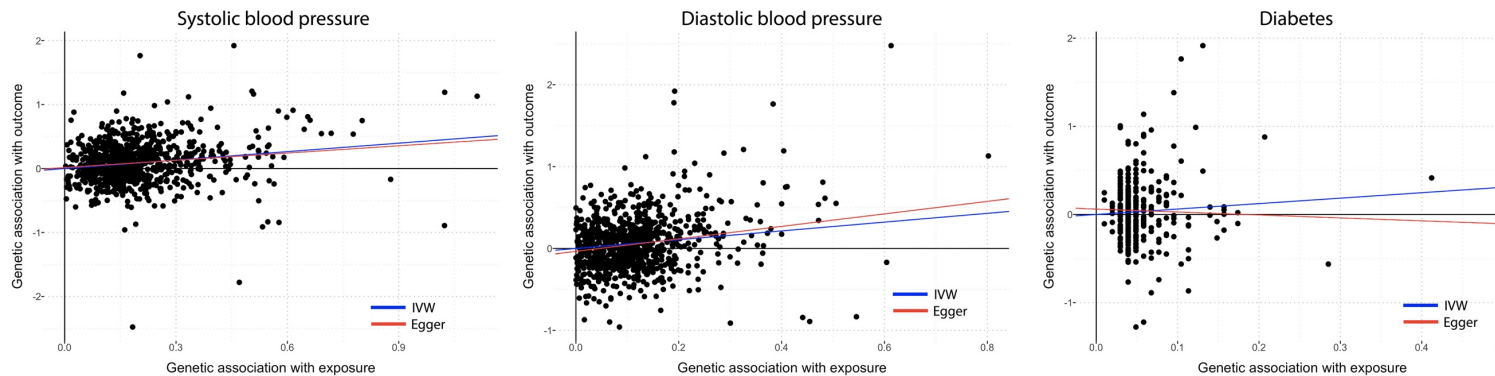

Depicted are scatterplots depicting results of two-sample Mendelian randomization. Each point is a genetic variant, the x-axis depicts strength of association between the variant and the exposure (i.e., systolic blood pressure, diastolic blood pressure, and diabetes, as labeled above each plot). The y-axis depicts strength of association between the variant and the outcome (i.e., left ventricular mass index in the top panels, and left ventricular mass in the bottom panels). Each plot depicts the result of inverse variance weighted regression (IVW, blue) and MR-Egger regression (red). A red line crossing the origin (y-intercept close to zero) suggests absence of substantial directional pleiotropy in the genetic instrument.

### Supplementary Figure 7. Distribution of CMR-derived LV mass

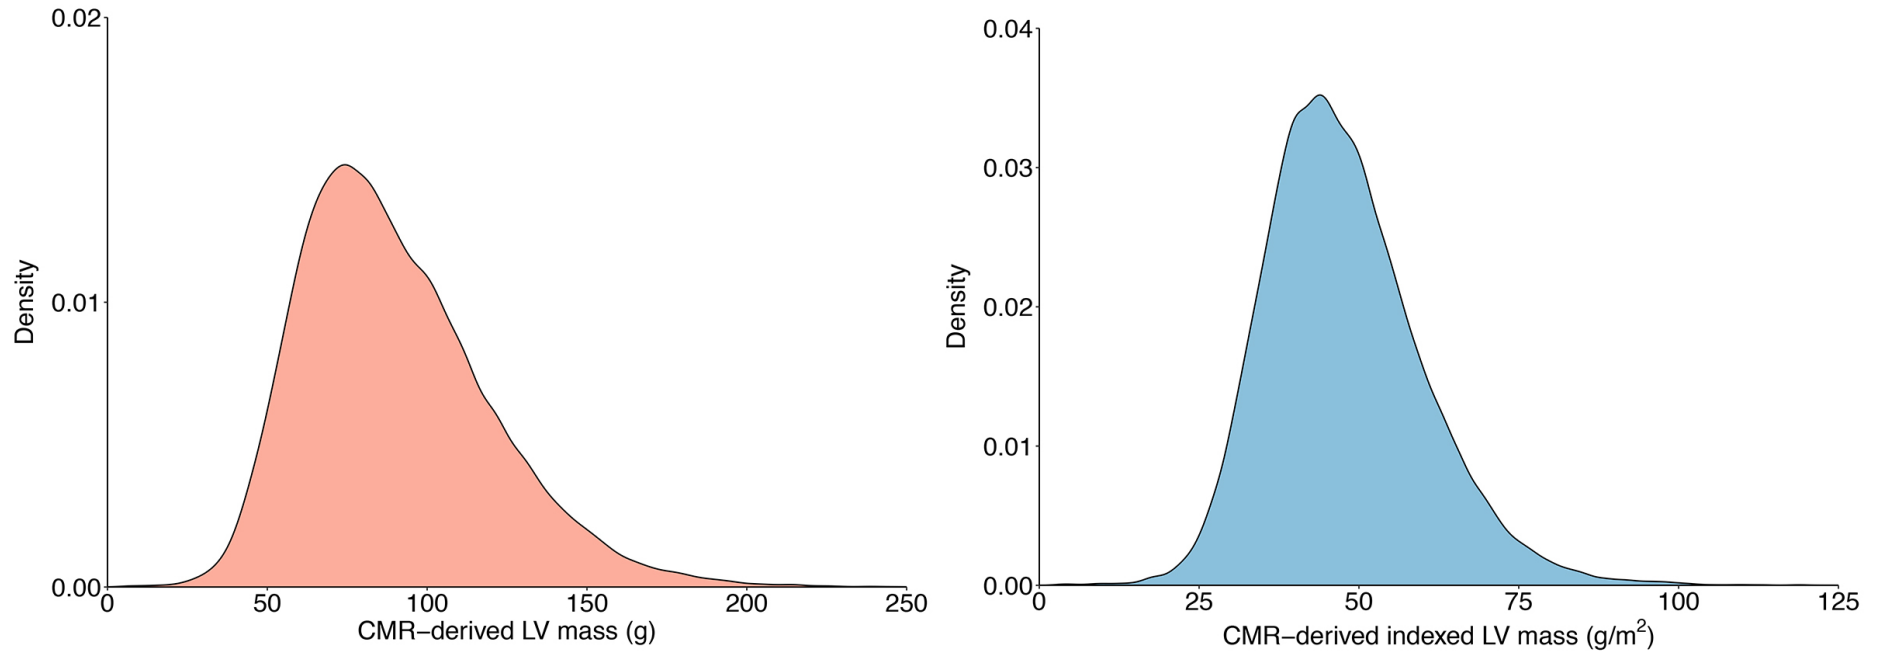

Depicted is the distribution of CMR-derived LV mass (LVM, left) and LV mass index (LVMI, right) within the UK Biobank phenotypic sample (N=44,375). The y-axis depicts the relative probability of an encountering a given value on the x-axis. For graphical purposes, four high outlying observations for LVM are not shown.

## Supplementary References

1. Aung, N. *et al.* Genome-Wide Analysis of Left Ventricular Image-Derived Phenotypes Identifies Fourteen Loci Associated With Cardiac Morphogenesis and Heart Failure Development. *Circulation* **140**, 1318–1330 (2019).
2. Giri, A. *et al.* Trans-ethnic association study of blood pressure determinants in over 750,000 individuals. *Nat Genet* **51**, 51–62 (2019).
3. Del Greco M, F. *et al.* Genome-wide association analysis and fine mapping of NT-proBNP level provide novel insight into the role of the MTHFR-CLCN6-NPPA-NPPB gene cluster. *Hum Mol Genet* **20**, 1660–1671 (2011).
4. Pirruccello, J. P. *et al.* Analysis of cardiac magnetic resonance imaging in 36,000 individuals yields genetic insights into dilated cardiomyopathy. *Nat Commun* **11**, 2254 (2020).
5. Herman, D. S. *et al.* Truncations of titin causing dilated cardiomyopathy. *N Engl J Med* **366**, 619–628 (2012).
6. Satoh, M. *et al.* Structural analysis of the titin gene in hypertrophic cardiomyopathy: identification of a novel disease gene. *Biochem Biophys Res Commun* **262**, 411–417 (1999).
7. Choi, S. H. *et al.* Association Between Titin Loss-of-Function Variants and Early-Onset Atrial Fibrillation. *JAMA* **320**, 2354–2364 (2018).
8. Eppinga, R. N. *et al.* Identification of genomic loci associated with resting heart rate and shared genetic predictors with all-cause mortality. *Nat Genet* **48**, 1557–1563 (2016).
9. Hanscombe, K. B. *et al.* The genetic case for cardiorespiratory fitness as a clinical vital sign and the routine prescription of physical activity in healthcare. *Genome Med* **13**, 180 (2021).
10. Kichaev, G. *et al.* Leveraging Polygenic Functional Enrichment to Improve GWAS Power. *Am J Hum Genet* **104**, 65–75 (2019).
11. the Million Veteran Program *et al.* Genetic analysis of over 1 million people identifies 535 new loci associated with blood pressure traits. *Nat Genet* **50**, 1412–1425 (2018).
12. van der Harst, P. & Verweij, N. Identification of 64 Novel Genetic Loci Provides an Expanded View on the Genetic Architecture of Coronary Artery Disease. *Circ Res* **122**, 433–443 (2018).
13. Onengut-Gumuscu, S. *et al.* Fine mapping of type 1 diabetes susceptibility loci and evidence for colocalization of causal variants with lymphoid gene enhancers. *Nat Genet* **47**, 381–386 (2015).
14. Zhao, W. *et al.* Identification of new susceptibility loci for type 2 diabetes and shared etiological pathways with coronary heart disease. *Nat Genet* **49**, 1450–1457 (2017).
15. CHARGE-EchoGen Consortium *et al.* The genetics of blood pressure regulation and its target organs from association studies in 342,415 individuals. *Nat Genet* **48**, 1171–1184 (2016).
16. Roselli, C. *et al.* Multi-ethnic genome-wide association study for atrial fibrillation. *Nat Genet* **50**, 1225–1233 (2018).
17. Shah, S. *et al.* Genome-wide association and Mendelian randomisation analysis provide insights into the pathogenesis of heart failure. *Nat Commun* **11**, 163 (2020).

18. Young, W. J. *et al.* Genetic analyses of the electrocardiographic QT interval and its components identify additional loci and pathways. *Nat Commun* **13**, 5144 (2022).
19. Ntalla, I. *et al.* Multi-ancestry GWAS of the electrocardiographic PR interval identifies 202 loci underlying cardiac conduction. *Nat Commun* **11**, 2542 (2020).
20. Wu, Y. *et al.* Genome-wide association study of medication-use and associated disease in the UK Biobank. *Nat Commun* **10**, 1891 (2019).
21. Watkins, H. *et al.* Mutations in the cardiac myosin binding protein-C gene on chromosome 11 cause familial hypertrophic cardiomyopathy. *Nat Genet* **11**, 434–437 (1995).
22. Daehmlow, S. *et al.* Novel mutations in sarcomeric protein genes in dilated cardiomyopathy. *Biochem Biophys Res Commun* **298**, 116–120 (2002).
23. Ramírez, J. *et al.* Common Genetic Variants Modulate the Electrocardiographic Tpeak-to-Tend Interval. *Am J Hum Genet* **106**, 764–778 (2020).
24. Prins, B. P. *et al.* Exome-chip meta-analysis identifies novel loci associated with cardiac conduction, including ADAMTS6. *Genome Biol* **19**, 87 (2018).
25. Nielsen, J. B. *et al.* Biobank-driven genomic discovery yields new insight into atrial fibrillation biology. *Nat Genet* **50**, 1234–1239 (2018).
26. Koyama, S. *et al.* Population-specific and trans-ancestry genome-wide analyses identify distinct and shared genetic risk loci for coronary artery disease. *Nat Genet* **52**, 1169–1177 (2020).
27. Ramírez, J. *et al.* Thirty loci identified for heart rate response to exercise and recovery implicate autonomic nervous system. *Nat Commun* **9**, 1947 (2018).
28. Verweij, N. *et al.* The Genetic Makeup of the Electrocardiogram. *Cell Syst* **11**, 229–238.e5 (2020).
29. van der Harst, P. *et al.* 52 Genetic Loci Influencing Myocardial Mass. *J Am Coll Cardiol* **68**, 1435–1448 (2016).
30. Begay, R. L. *et al.* Filamin C Truncation Mutations Are Associated With Arrhythmogenic Dilated Cardiomyopathy and Changes in the Cell-Cell Adhesion Structures. *JACC Clin Electrophysiol* **4**, 504–514 (2018).
31. Valdés-Mas, R. *et al.* Mutations in filamin C cause a new form of familial hypertrophic cardiomyopathy. *Nat Commun* **5**, 5326 (2014).
32. Brodehl, A. *et al.* Mutations in FLNC are Associated with Familial Restrictive Cardiomyopathy. *Hum Mutat* **37**, 269–279 (2016).
33. Schizophrenia Working Group of the Psychiatric Genomics Consortium *et al.* LD Score regression distinguishes confounding from polygenicity in genome-wide association studies. *Nat Genet* **47**, 291–295 (2015).
