# Supplementary material for: Clinical and genetic associations of deep learning-derived cardiac magnetic resonance-based left ventricular mass
Source: PubMed Central journal article supplement (PMC10030590; doi:10.1038/s41467-023-37173-w), 2023-03-21
Supplement: 41467_2023_37173_MOESM3_ESM.pdf [file 41467_2023_37173_MOESM3_ESM.pdf]

**File name:** Supplementary Data 1

**Description:** Disease definitions
